# Supplementary material for: PathCards: multi-source consolidation of human biological pathways
Source: Oxford University Press journal article supplement (doi:10.1093/database/bav006), 2015-01-01
Supplement: bav006_Supplementary_Data.zip [file bav006_Supplementary_Data.zip]

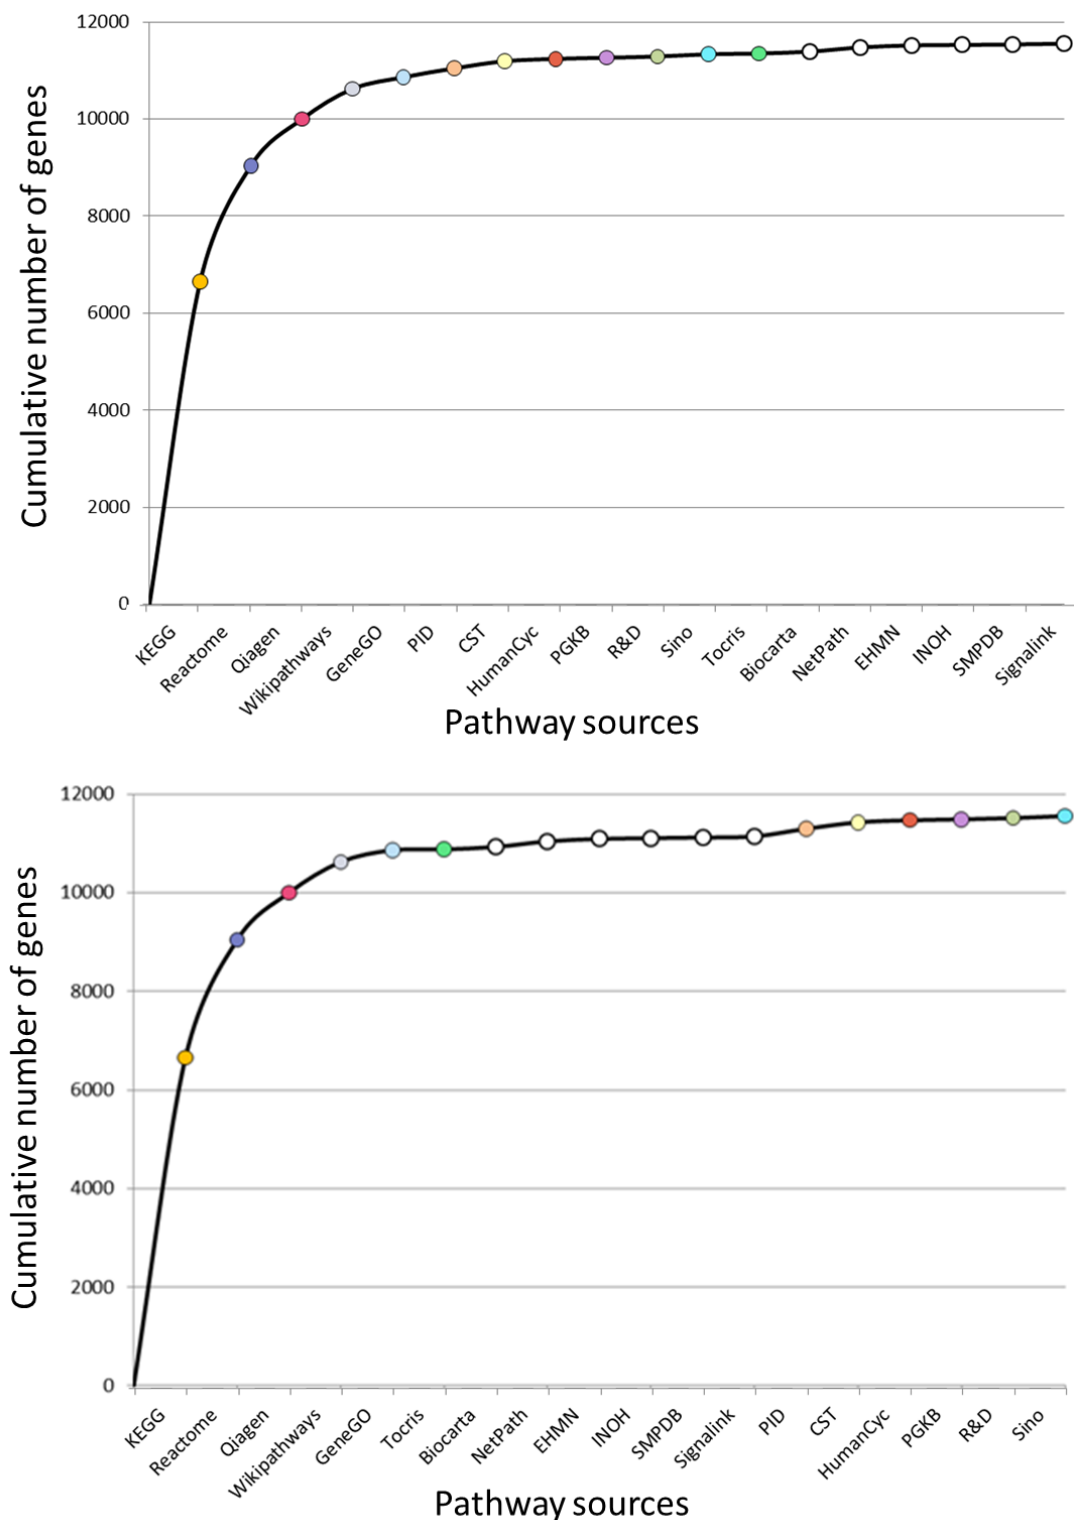

Figure S1. **(A)** Change of cumulative gene counts (removing duplicates) upon addition of pathway sources. Increase of total gene count by addition of sources approaches saturation after the first 12. The six additional sources (white) increase the total gene count by 2%. The order of source addition is based on the number of genes in each source and taking into account the popularity of the source, as reflected by the number of citations. **(B)** Switching the last 6 sources results in a very similar graph with increase of 4% in the total gene count.

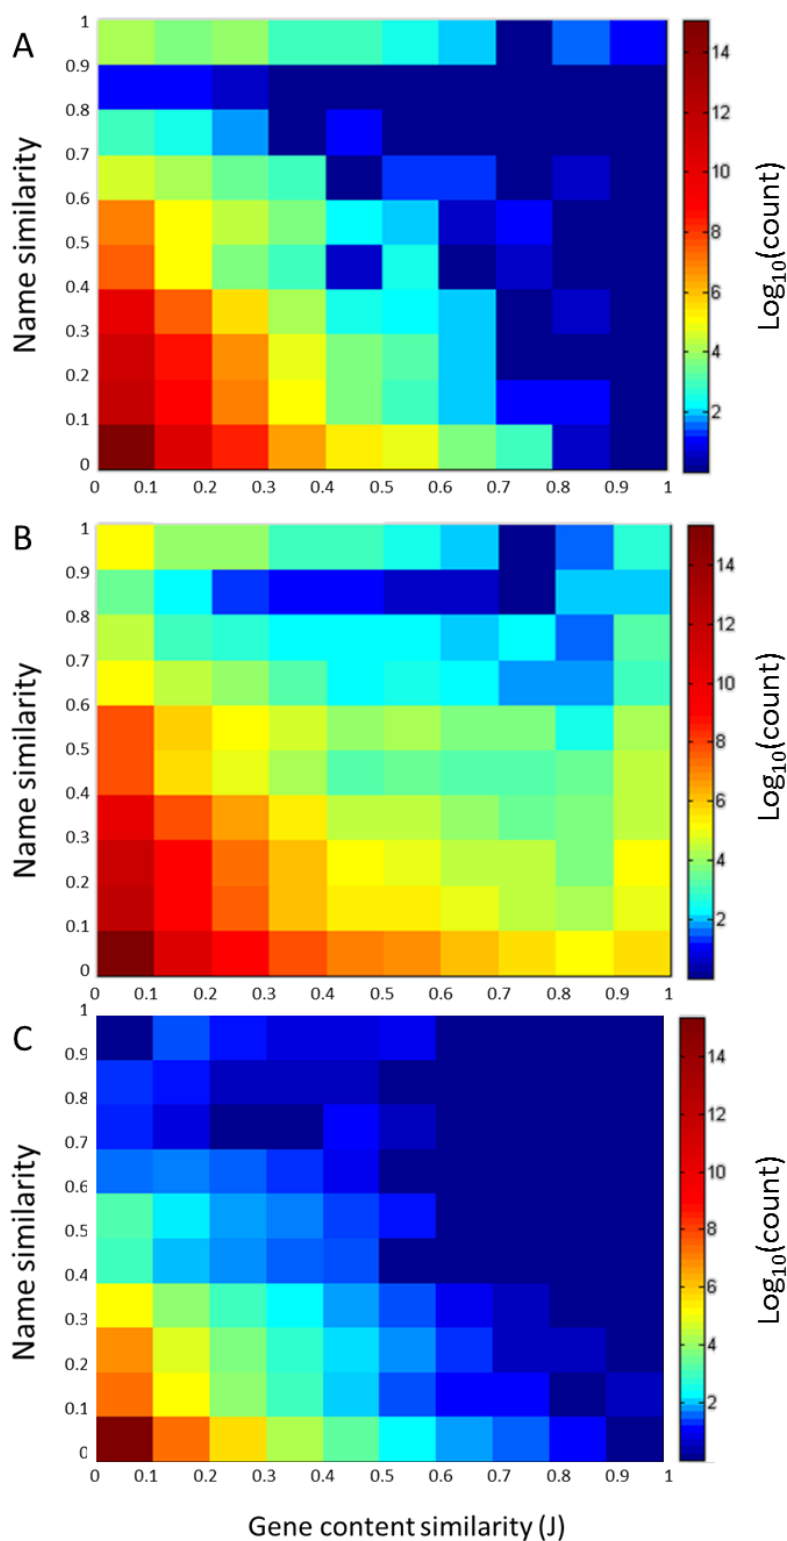

Figure S2. Name similarity versus gene-content similarity. **(A)** Name similarity vs. gene-content similarity in Pathway pairs where each pathway is from a different source. **(B)** Name similarity vs. gene-content similarity in all pathway pairs. **(C)** Name similarity vs. gene-content similarity in SuperPaths.

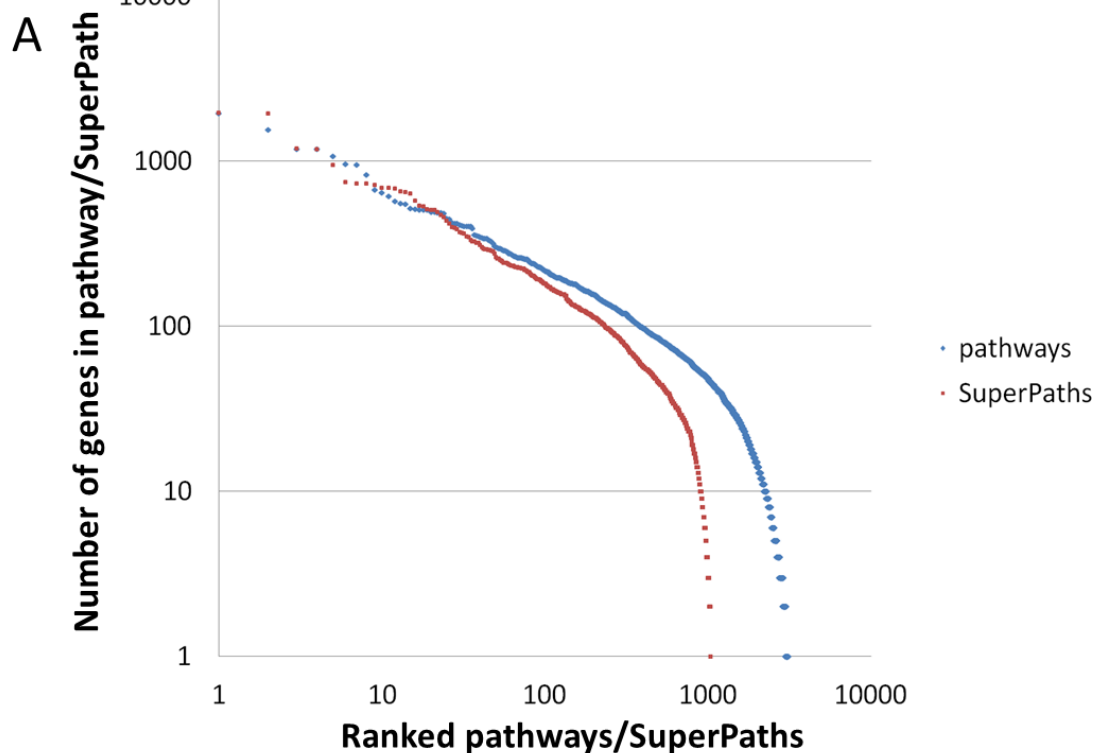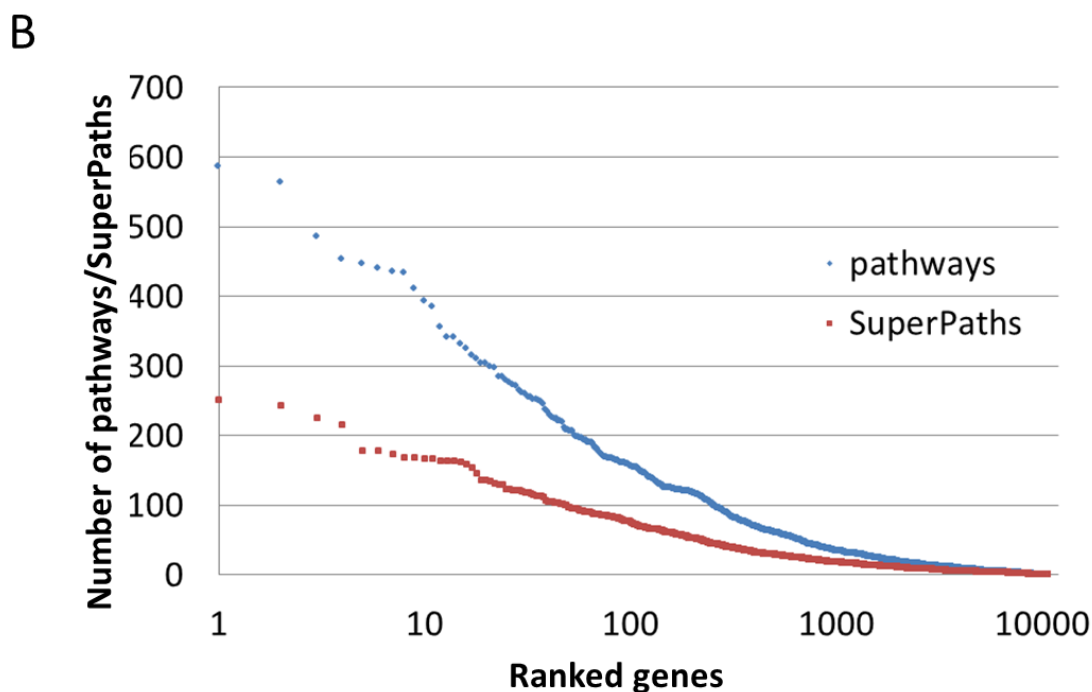

Figure S3. Genes vs. pathways and SuperPaths. **(A)** Number of genes in SuperPaths and Pathways. The pathways (blue) and SuperPaths (red) are ranked in descending order. The number of genes in pathways and SuperPaths have a similar shape indicating a similar distribution of gene count across pathways and SuperPaths. **(B)** The Number of pathways and SuperPaths across all ranked genes. Consolidation of pathways into SuperPaths reduces greatly the amount of pathway-related annotation per gene, especially for highly annotated genes.

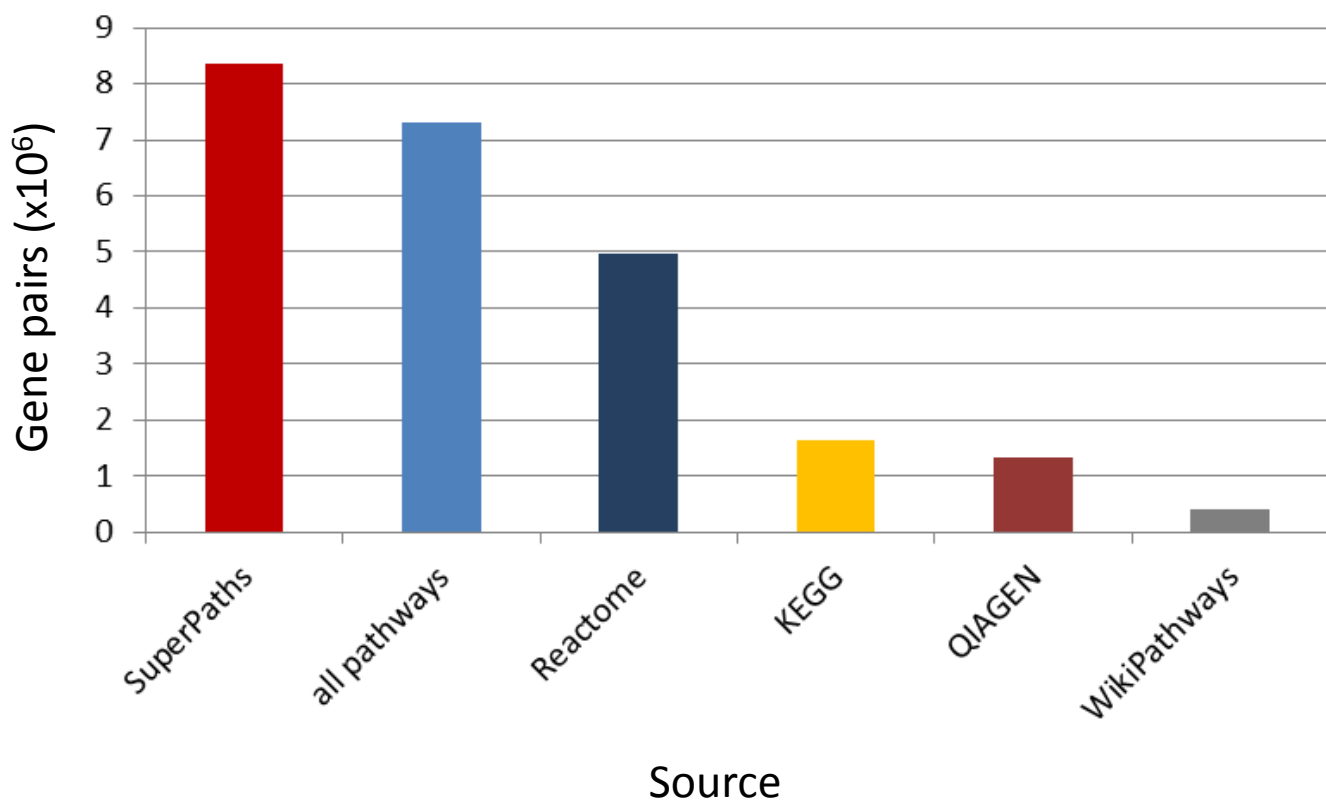

Figure S4. Enhancement of gene pair counts in SuperPaths. SuperPaths provide 14% more gene pairs than all pathway sources combined and x1.68 to x20 higher numbers than in the individual four largest pathway sources.

A

SuperPaths for SDHC [About](#) [improved](#)  
[See pathways by source](#)

|   | SuperPath                                                                                                                           | Contained pathways <a href="#">About</a>                                                                                            |      |                                                                                  |      |
|---|-------------------------------------------------------------------------------------------------------------------------------------|-------------------------------------------------------------------------------------------------------------------------------------|------|----------------------------------------------------------------------------------|------|
| 1 | <a href="#">Citric acid cycle (TCA cycle)</a>                                                                                       | <a href="#">Citric acid cycle (TCA cycle)</a>                                                                                       | 0.55 | <a href="#">conversion of glucose to acetyl CoA and entry into the TCA cycle</a> | 0.43 |
|   |                                                                                                                                     | <a href="#">Citrate cycle (TCA cycle)</a>                                                                                           | 0.55 | <a href="#">TCA Cycle</a>                                                        | 0.00 |
|   |                                                                                                                                     | <a href="#">Pyruvate metabolism and Citric Acid (TCA) cycle</a>                                                                     | 0.49 | <a href="#">TCA cycle</a>                                                        | 0.00 |
| 2 | <a href="#">Respiratory electron transport, ATP synthesis by chemiosmotic coupling, and heat production by uncoupling proteins.</a> | <a href="#">Respiratory electron transport, ATP synthesis by chemiosmotic coupling, and heat production by uncoupling proteins.</a> | 0.81 | <a href="#">Oxidative phosphorylation</a>                                        | 0.64 |
|   |                                                                                                                                     | <a href="#">Respiratory electron transport</a>                                                                                      | 0.81 | <a href="#">Parkinson's disease</a>                                              | 0.57 |
|   |                                                                                                                                     | <a href="#">Electron Transport Chain</a>                                                                                            | 0.75 | <a href="#">Huntington's disease</a>                                             | 0.45 |
|   |                                                                                                                                     | <a href="#">The citric acid (TCA) cycle and respiratory electron transport</a>                                                      | 0.71 | <a href="#">Non-alcoholic fatty liver disease (NAFLD)</a>                        | 0.41 |
| 3 | <a href="#">Metabolism</a>                                                                                                          | <a href="#">Metabolism</a>                                                                                                          | 0.38 | <a href="#">Metabolic pathways</a>                                               | 0.38 |
| 4 | <a href="#">Alzheimer's disease</a>                                                                                                 | <a href="#">Alzheimer's disease</a>                                                                                                 | 0.44 |                                                                                  |      |
| 5 | <a href="#">Carbon metabolism</a>                                                                                                   | <a href="#">Carbon metabolism</a>                                                                                                   | 0.38 |                                                                                  |      |

B

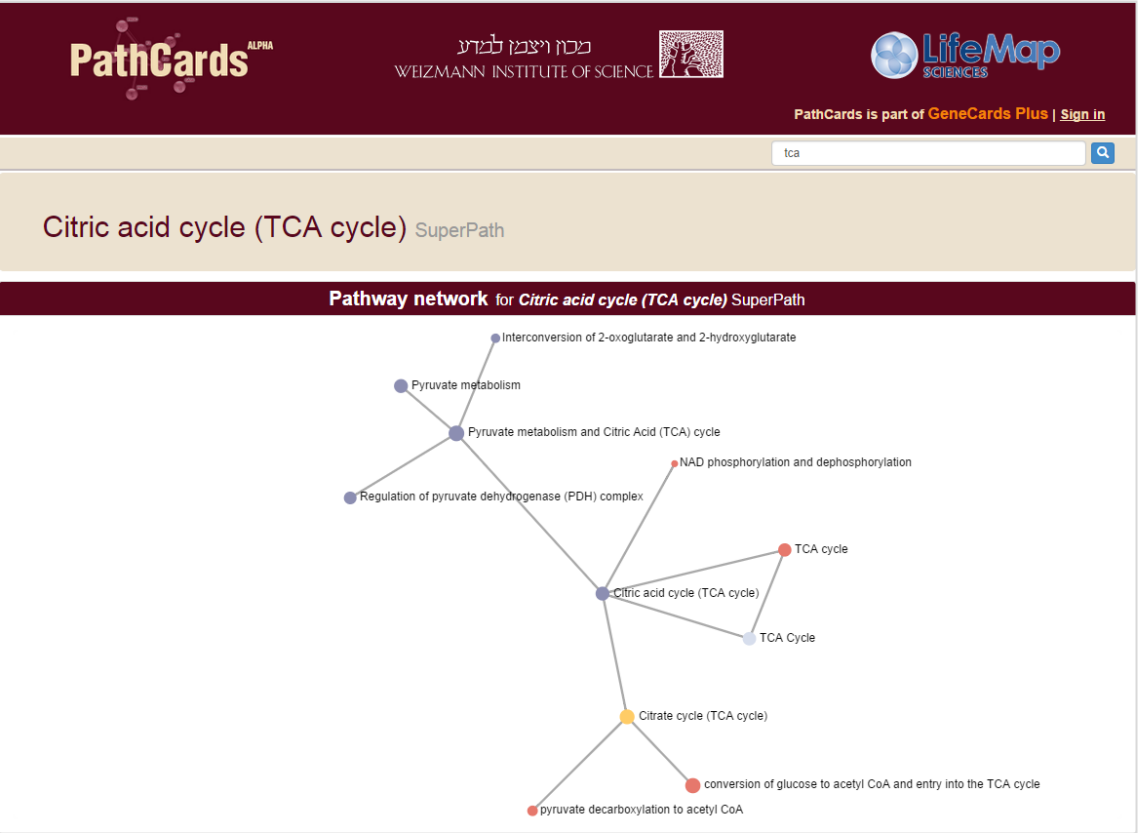

Figure S5. SuperPaths representation in GeneCards and PathCards. **(A)** SuperPath representation in GeneCards for the SDHC gene. All the gene's SuperPaths are shown (left), each with its constituent source-specific individual pathways (right), affording an effective overview. **(B)** SuperPath network representation in PathCards. The TCA cycle SuperPath is shown with 11 pathways from 4 sources, with connecting edges as defined in Fig. 3B.

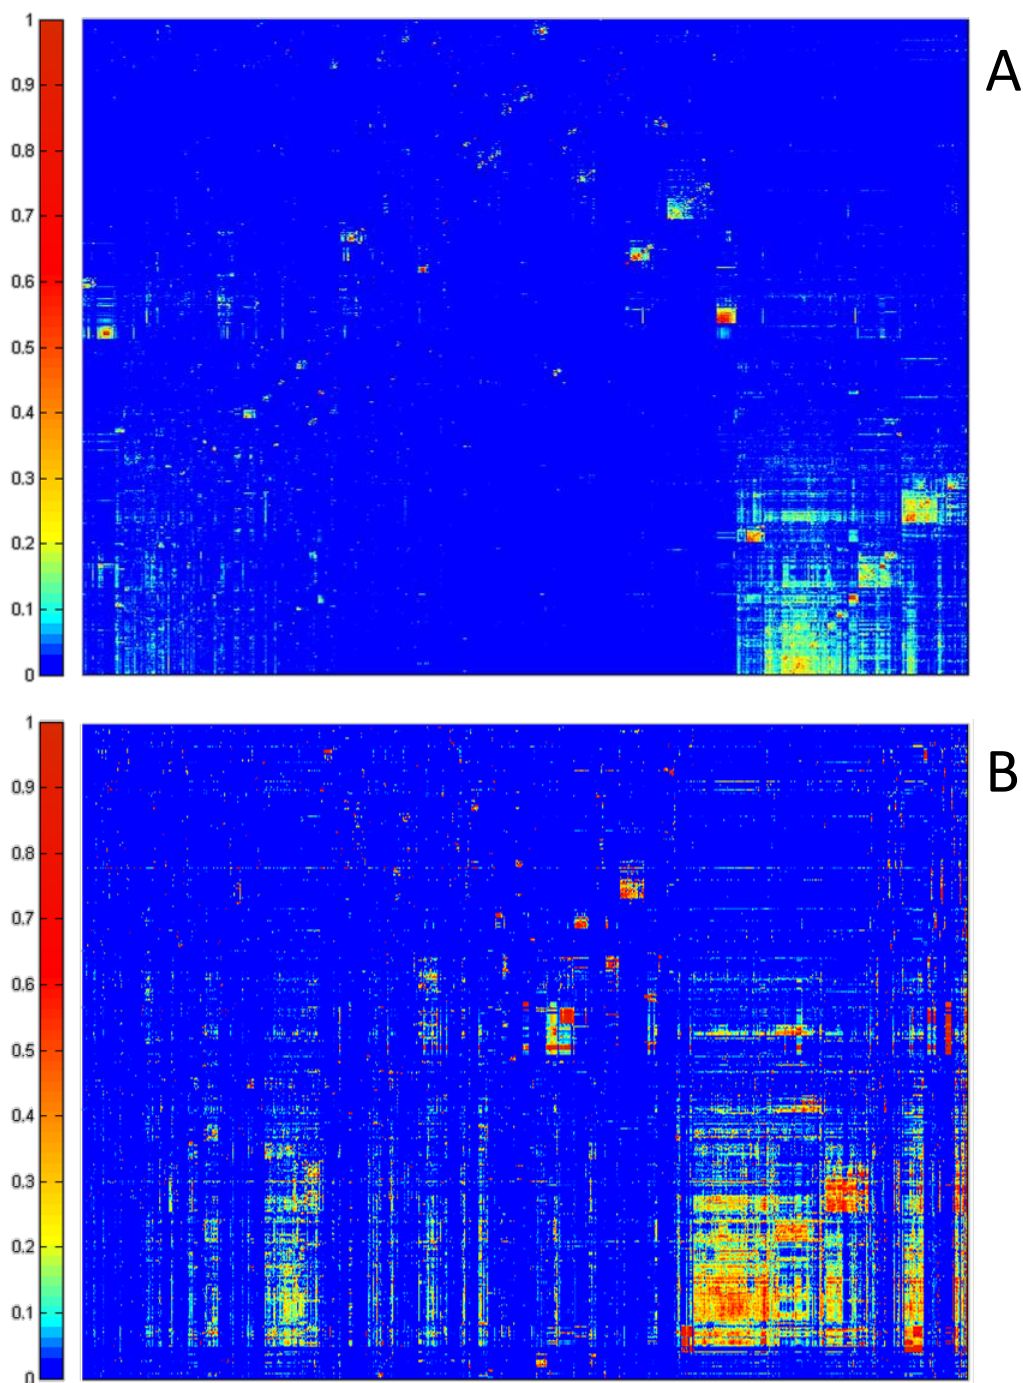

Figure S6. Pathway similarity. **(A)** All pairwise Jaccard index similarity clustered using the clustergram function **(B)** All pairwise percent similarity to the smaller pathway, clustered using the clustergram function.

Table S1. Pathway alignment significance vs. Jaccard similarity coefficient

|    | Pathway1<br>(query in MetaPathwayHunter)                    | Pathway2                                                | Jaccard<br>coefficient | ALN<br>P | # of ALN for query<br>where P<0.01 |
|----|-------------------------------------------------------------|---------------------------------------------------------|------------------------|----------|------------------------------------|
| 1  | yeast_de_novo_purine_nuc_biosynth (1)                       | yeast_super_histidine_purine_pyrimidine_biosynth        | 0.486486               | <0.01    | 1                                  |
| 2  | yeast_phenylalanine_tyrosine_tryptophan_biosynth (2)        | yeast_chorismate_pathway (5)                            | 0.533333               | <0.01    | 1                                  |
| 3  | yeast_folic_acid_biosynth (3)                               | yeast_chorismate_pathway (5)                            | 0.387097               | <0.01    | 1                                  |
| 4  | yeast_super_phenylalanine_tyrosine_tryptophane_biosynth (4) | yeast_chorismate_pathway (5)                            | 0.3                    | <0.01    | 2                                  |
| 5  | yeast_super_phenylalanine_tyrosine_tryptophane_biosynth (4) | yeast_phenylalanine_tyrosine_tryptophan_biosynth        | 0.5625                 | <0.01    | 2                                  |
| 6  | yeast_tryptophan_biosynth (6)                               | yeast_phenylalanine_tyrosine_tryptophan_biosynth        | 0.3125                 | <0.01    | 3                                  |
| 7  | yeast_mevalonate_pathway (7)                                | yeast_ergosterol_biosynth                               | 0.466667               | <0.01    | 1                                  |
| 8  | yeast_glycolysis (8)                                        | yeast_glucose_fermentation                              | 0.5                    | <0.01    | 1                                  |
| 9  | yeast_aerobic_glycerol_catabolism (9)                       | yeast_glucose_fermentation                              | 0.333333               | <0.01    | 1                                  |
| 10 | yeast_phosphatidic_biosynth (10)                            | yeast_phosphatidic_acid_phospholipid_biosynth           | 0.615385               | <0.01    | 1                                  |
| 11 | yeast_sulfate_assimilation_pathway2 (11)                    | yeast_sulfur_amino_acid_biosynth                        | 0.454545               | <0.01    | 2                                  |
| 12 | yeast_ubiquinone_Q_prenylation (12)                         | yeast_ubiquinone_biosynth                               | 0.555556               | <0.01    | 1                                  |
| 13 | yeast_hexaprenyl_diphosphate_biosynth (13)                  | yeast_ubiquinone_biosynth                               | 0.444444               | <0.01    | 2                                  |
| 14 | yeast_deoxyribose_phosphate_metabolism (14)                 | yeast_ribose_deoxyribose_phosphate_metabolism           | 0.75                   | <0.01    | 1                                  |
| 15 | yeast_ribose_catabolism (15)                                | yeast_ribose_deoxyribose_phosphate_metabolism           | 0.375                  | <0.01    | 4                                  |
| 16 | yeast_tryptophan_biosynth (6)                               | yeast_super_phenylalanine_tyrosine_tryptophane_biosynth | 0.555556               | <0.01    | 3                                  |
| 17 | yeast_super_phenylalanine_tyrosine_biosynth (16)            | yeast_super_phenylalanine_tyrosine_tryptophane_biosynth | 0.444444               | <0.01    | 3                                  |
| 18 | yeast_tyrosine_biosynth (17)                                | yeast_super_phenylalanine_tyrosine_tryptophane_biosynth | 0.333333               | <0.01    | 4                                  |
| 19 | yeast_glycolysis (8)                                        | yeast_aerobic_glycerol_catabolism                       | 0.5                    | -        | 1                                  |
| 20 | yeast_glutamate_degradation8 (18)                           | yeast_arginine_metabolism                               | 0.625                  | <0.01    | 1                                  |
| 21 | yeast_fatty_acid_elongation (19)                            | yeast_fatty_acid_biosynth                               | 0.375                  | <0.01    | 1                                  |
| 22 | yeast_salvage_pyrimidine_deoxyribonucleotide_pathway (20)   | yeast_salvage_pyrimidine_ribonucleotide_pathway         | 0.3                    | <0.01    | 1                                  |
| 23 | yeast_super_isoleucine_valine_biosynth2 (21)                | yeast_super_leucine_isoleucine_valine_biosynth1         | 0.571429               | <0.01    | 5                                  |
| 24 | yeast_leucine_biosynth (22)                                 | yeast_super_leucine_isoleucine_valine_biosynth1         | 0.571429               | <0.01    | 2                                  |
| 25 | yeast_valine_biosynth (23)                                  | yeast_super_leucine_isoleucine_valine_biosynth1         | 0.571429               | <0.01    | 5                                  |
| 26 | yeast_isoleucine_biosynth (24)                              | yeast_super_leucine_isoleucine_valine_biosynth1         | 0.5                    | <0.01    | 3                                  |
| 27 | yeast_super_isoleucine_valine_biosynth1 (25)                | yeast_super_leucine_isoleucine_valine_biosynth1         | 0.5                    | <0.01    | 3                                  |
| 28 | yeast_super_leucine_isoleucine_valine_biosynth2 (26)        | yeast_super_leucine_isoleucine_valine_biosynth1         | 0.333333               | <0.01    | 3                                  |
| 29 | yeast_methionine_biosynth (27)                              | yeast_threonine_methionine_biosynth                     | 0.75                   | <0.01    | 3                                  |
| 30 | yeast_threonine_biosynth (28)                               | yeast_threonine_methionine_biosynth                     | 0.625                  | <0.01    | 2                                  |

### 1) yeast\_de\_novo\_purine\_nuc\_biosynth

| Match results                                        |             |         |
|------------------------------------------------------|-------------|---------|
| Text File Name                                       | Match Score | P-Value |
| yeast_de_novo_purine_nuc_biosynth.grp                | 0.0         | 0.0     |
| yeast_super_histidine_purine_pyrimidine_biosynth.grp | -55.3076    | 0.0     |
| yeast_super_histidine_purine_pyrimidine_biosynth.grp | -55.3076    | 0.0     |
| yeast_super_histidine_purine_pyrimidine_biosynth.grp | -57.0441    | 0.0     |
| yeast_super_histidine_purine_pyrimidine_biosynth.grp | -58.2822    | 0.0     |
| yeast_super_histidine_purine_pyrimidine_biosynth.grp | -61.3076    | 0.0     |

Click on a column name to sort table. Click on a row to view match.

### 2) yeast\_phenylalanine\_tyrosine\_tryptophan\_biosynth

| Match results                                        |             |         |
|------------------------------------------------------|-------------|---------|
| Text File Name                                       | Match Score | P-Value |
| yeast_phenylalanine_tyrosine_tryptophan_biosynth.grp | 0.0         | 0.0     |
| yeast_chorismate_pathway.grp                         | 0.0         | 0.0     |
| yeast_chorismate_pathway.grp                         | -46.851     | 0.0     |
| yeast_chorismate_pathway.grp                         | -81.7949    | 0.0     |
| yeast_chorismate_pathway.grp                         | -83.7949    | 0.0     |
| yeast_chorismate_pathway.grp                         | -115.568    | 0.05    |
| yeast_super_histidine_purine_pyrimidine_biosynth.grp | -133.677    | 0.92    |
| yeast_super_histidine_purine_pyrimidine_biosynth.grp | -133.677    | 0.92    |
| yeast_super_histidine_purine_pyrimidine_biosynth.grp | -134.021    | 0.97    |
| yeast_super_histidine_purine_pyrimidine_biosynth.grp | -135.011    | 0.97    |
| yeast_super_histidine_purine_pyrimidine_biosynth.grp | -136.473    | 1.0     |

Click on a column name to sort table. Click on a row to view match.

### 3) yeast\_folic\_acid\_biosynth

| Match results                                        |             |         |
|------------------------------------------------------|-------------|---------|
| Text File Name                                       | Match Score | P-Value |
| yeast_folic_acid_biosynth.grp                        | 0.0         | 0.0     |
| yeast_chorismate_pathway.grp                         | -29.0899    | 0.0     |
| yeast_chorismate_pathway.grp                         | -29.9647    | 0.0     |
| yeast_chorismate_pathway.grp                         | -31.9647    | 0.0     |
| yeast_chorismate_pathway.grp                         | -33.9647    | 0.0     |
| yeast_chorismate_pathway.grp                         | -35.9647    | 0.0     |
| yeast_super_histidine_purine_pyrimidine_biosynth.grp | -96.4068    | 0.02    |
| yeast_super_histidine_purine_pyrimidine_biosynth.grp | -97.2834    | 0.02    |
| yeast_super_histidine_purine_pyrimidine_biosynth.grp | -98.4068    | 0.03    |
| yeast_super_histidine_purine_pyrimidine_biosynth.grp | -99.2834    | 0.05    |
| yeast_super_histidine_purine_pyrimidine_biosynth.grp | -100.84     | 0.06    |

Click on a column name to sort table. Click on a row to view match.



#### 4) yeast\_super\_phenylalalinin\_tyrosine\_tryptophane\_biosynth

| Match results                                               |             |         |
|-------------------------------------------------------------|-------------|---------|
| Text File Name                                              | Match Score | P-Value |
| yeast_super_phenylalanine_tyrosine_tryptophane_biosynth.grp | 0.0         | 0.0     |
| yeast_phenylalanine_tyrosine_tryptophan_biosynth.grp        | -7.76519    | 0.0     |
| yeast_chorismate_pathway.grp                                | -7.76519    | 0.0     |
| yeast_chorismate_pathway.grp                                | -24.1995    | 0.0     |
| yeast_phenylalanine_tyrosine_tryptophan_biosynth.grp        | -25.4135    | 0.0     |
| yeast_phenylalanine_tyrosine_tryptophan_biosynth.grp        | -25.4135    | 0.0     |
| yeast_chorismate_pathway.grp                                | -25.4135    | 0.0     |
| yeast_chorismate_pathway.grp                                | -25.4135    | 0.0     |
| yeast_phenylalanine_tyrosine_tryptophan_biosynth.grp        | -27.4135    | 0.0     |
| yeast_phenylalanine_tyrosine_tryptophan_biosynth.grp        | -27.4135    | 0.0     |
| yeast_chorismate_pathway.grp                                | -27.4135    | 0.0     |
| yeast_super_histidine_purine_pyrimidine_biosynth.grp        | -69.4023    | 0.34    |
| yeast_super_histidine_purine_pyrimidine_biosynth.grp        | -71.4023    | 0.55    |
| yeast_super_histidine_purine_pyrimidine_biosynth.grp        | -71.4666    | 0.56    |
| yeast_super_histidine_purine_pyrimidine_biosynth.grp        | -72.0729    | 0.63    |
| yeast_super_histidine_purine_pyrimidine_biosynth.grp        | -72.3647    | 0.7     |
| yeast_de_novo_purine_nuc_biosynth.grp                       | -75.2948    | 0.9     |
| yeast_de_novo_purine_nuc_biosynth.grp                       | -77.2948    | 0.95    |
| yeast_de_novo_purine_nuc_biosynth.grp                       | -79.2948    | 1.0     |
| yeast_phosphatidic_acid_phospholipid_biosynth.grp           | -79.6956    | 1.0     |
| yeast_phosphatidic_acid_phospholipid_biosynth.grp           | -79.6956    | 1.0     |
| yeast_folic_acid_biosynth.grp                               | -79.7197    | 1.0     |
| yeast_folic_acid_biosynth.grp                               | -79.7197    | 1.0     |
| yeast_de_novo_purine_nuc_biosynth.grp                       | -80.4193    | 1.0     |
| yeast_de_novo_purine_nuc_biosynth.grp                       | -80.4817    | 1.0     |
| yeast_phosphatidic_acid_phospholipid_biosynth.grp           | -80.9337    | 1.0     |
| yeast_phosphatidic_acid_phospholipid_biosynth.grp           | -80.9337    | 1.0     |
| yeast_phosphatidic_acid_phospholipid_biosynth.grp           | -80.9337    | 1.0     |
| yeast_folic_acid_biosynth.grp                               | -81.7197    | 1.0     |
| yeast_folic_acid_biosynth.grp                               | -81.7197    | 1.0     |
| yeast_folic_acid_biosynth.grp                               | -83.7197    | 1.0     |

Click on a column name to sort table. Click on a row to view match.

## 5) yeast\_chorismate\_biosynth

| Match results                                               |             |         |
|-------------------------------------------------------------|-------------|---------|
| Text File Name                                              | Match Score | P-Value |
| yeast_phenylalanine_tyrosine_tryptophan_biosynth.grp        | 0.0         | 0.0     |
| yeast_chorismate_pathway.grp                                | 0.0         | 0.0     |
| yeast_chorismate_biosynth.grp                               | 0.0         | 0.0     |
| yeast_chorismate_pathway.grp                                | -37.6758    | 0.0     |
| yeast_phenylalanine_tyrosine_tryptophan_biosynth.grp        | -39.2454    | 0.0     |
| yeast_chorismate_pathway.grp                                | -39.2454    | 0.0     |
| yeast_chorismate_pathway.grp                                | -39.4951    | 0.01    |
| yeast_phenylalanine_tyrosine_tryptophan_biosynth.grp        | -40.1278    | 0.01    |
| yeast_phenylalanine_tyrosine_tryptophan_biosynth.grp        | -41.9471    | 0.02    |
| yeast_chorismate_pathway.grp                                | -42.1304    | 0.04    |
| yeast_chorismate_biosynth.grp                               | -44.3991    | 0.14    |
| yeast_glucose_fermentation.grp                              | -45.438     | 0.24    |
| yeast_phenylalanine_tyrosine_tryptophan_biosynth.grp        | -45.893     | 0.29    |
| yeast_heme_biosynth.grp                                     | -46.4579    | 0.33    |
| yeast_sulfur_amino_acid_biosynth.grp                        | -46.7048    | 0.36    |
| yeast_serine_isocitrate_lyase_pathway.grp                   | -46.8299    | 0.37    |
| yeast_glucose_fermentation.grp                              | -47.438     | 0.4     |
| yeast_TCA_cycle_aerobic_respiration.grp                     | -47.4789    | 0.4     |
| yeast_serine_isocitrate_lyase_pathway.grp                   | -47.5192    | 0.4     |
| yeast_serine_isocitrate_lyase_pathway.grp                   | -47.7123    | 0.43    |
| yeast_serine_isocitrate_lyase_pathway.grp                   | -48.1215    | 0.46    |
| yeast_heme_biosynth.grp                                     | -48.4579    | 0.47    |
| yeast_glycolysis.grp                                        | -48.7262    | 0.5     |
| yeast_glucose_fermentation.grp                              | -48.7262    | 0.5     |
| yeast_TCA_cycle_aerobic_respiration.grp                     | -48.7434    | 0.5     |
| yeast_serine_isocitrate_lyase_pathway.grp                   | -48.8834    | 0.53    |
| yeast_glucose_fermentation.grp                              | -49.1095    | 0.57    |
| yeast_de_novo_purine_nuc_biosynth.grp                       | -49.2819    | 0.57    |
| yeast_ergosterol_biosynth.grp                               | -49.3758    | 0.59    |
| yeast_glucose_fermentation.grp                              | -49.438     | 0.59    |
| yeast_ubiquinone_biosynth.grp                               | -49.5833    | 0.59    |
| yeast_ergosterol_biosynth.grp                               | -49.5833    | 0.59    |
| yeast_ergosterol_biosynth.grp                               | -49.9389    | 0.61    |
| yeast_p_cymene_degradation.grp                              | -49.9814    | 0.63    |
| yeast_super_histidine_purine_pyrimidine_biosynth.grp        | -50.1402    | 0.66    |
| yeast_super_phenylalanine_tyrosine_tryptophane_biosynth.grp | -50.1642    | 0.67    |
| yeast_super_phenylalanine_tyrosine_tryptophane_biosynth.grp | -50.1642    | 0.67    |
| yeast_ergosterol_biosynth.grp                               | -50.2318    | 0.69    |
| yeast_super_leucine_ileucine_valine_biosynth1.grp           | -50.4795    | 0.7     |
| yeast_folic_acid_biosynth.grp                               | -50.6838    | 0.72    |
| yeast_ubiquinone_biosynth.grp                               | -50.7348    | 0.74    |
| yeast_ergosterol_biosynth.grp                               | -50.7348    | 0.74    |
| yeast_aerobic_glycerol_catabolism.grp                       | -51.1782    | 0.77    |
| yeast_super_histidine_purine_pyrimidine_biosynth.grp        | -51.1852    | 0.77    |
| yeast_de_novo_purine_nuc_biosynth.grp                       | -51.1852    | 0.77    |
| yeast_de_novo_purine_nuc_biosynth.grp                       | -51.1852    | 0.77    |
| yeast_de_novo_purine_nuc_biosynth.grp                       | -51.1852    | 0.77    |
| yeast_phosphatidic_biosynth.grp                             | -51.2406    | 0.78    |
| yeast_phosphatidic_acid_phospholipid_biosynth.grp           | -51.2406    | 0.78    |
| yeast_phosphatidic_acid_phospholipid_biosynth.grp           | -51.2406    | 0.78    |
| yeast_phosphatidic_acid_phospholipid_biosynth.grp           | -51.2406    | 0.78    |
| yeast_de_novo_purine_nuc_biosynth.grp                       | -51.2819    | 0.8     |
| yeast_super_leucine_ileucine_valine_biosynth1.grp           | -51.3619    | 0.81    |
| yeast_p_cymene_degradation.grp                              | -51.3619    | 0.81    |
| yeast_super_phenylalanine_tyrosine_tryptophane_biosynth.grp | -51.3782    | 0.81    |
| yeast_super_histidine_purine_pyrimidine_biosynth.grp        | -51.3782    | 0.81    |

Click on a column name to sort table. Click on a row to view match.

## 6) yeast\_trypthophan\_biosynth

| Match results                                                |             |         |
|--------------------------------------------------------------|-------------|---------|
| Text File Name                                               | Match Score | P-Value |
| yeast_trypthophan_biosynth.grp                               | 0.0         | 0.0     |
| yeast_super_phenylalanine_tyrosine_trypthophane_biosynth.grp | 0.0         | 0.0     |
| yeast_phenylalanine_tyrosine_trypthophan_biosynth.grp        | 0.0         | 0.0     |
| yeast_chorismate_pathway.grp                                 | 0.0         | 0.0     |
| yeast_super_phenylalanine_tyrosine_trypthophane_biosynth.grp | -2.0        | 0.0     |
| yeast_phenylalanine_tyrosine_trypthophan_biosynth.grp        | -2.0        | 0.0     |
| yeast_chorismate_pathway.grp                                 | -2.0        | 0.0     |
| yeast_phenylalanine_tyrosine_trypthophan_biosynth.grp        | -4.0        | 0.0     |
| yeast_chorismate_pathway.grp                                 | -4.0        | 0.0     |
| yeast_phenylalanine_tyrosine_trypthophan_biosynth.grp        | -6.0        | 0.0     |
| yeast_chorismate_pathway.grp                                 | -6.0        | 0.0     |
| yeast_phenylalanine_tyrosine_trypthophan_biosynth.grp        | -8.0        | 0.0     |
| yeast_chorismate_pathway.grp                                 | -8.0        | 0.0     |
| yeast_super_phenylalanine_tyrosine_trypthophane_biosynth.grp | -17.9824    | 0.0     |
| yeast_super_phenylalanine_tyrosine_trypthophane_biosynth.grp | -27.4582    | 0.04    |
| yeast_super_phenylalanine_tyrosine_trypthophane_biosynth.grp | -27.828     | 0.04    |
| yeast_trypthophan_biosynth.grp                               | -27.9647    | 0.04    |
| yeast_serine_isocitrate_lyase_pathway.grp                    | -28.1663    | 0.05    |
| yeast_super_leucine_ileucine_valine_biosynth1.grp            | -28.7184    | 0.07    |
| yeast_super_histidine_purine_pyrimidine_biosynth.grp         | -28.855     | 0.07    |
| yeast_histidine_biosynth.grp                                 | -28.855     | 0.07    |
| yeast_serine_isocitrate_lyase_pathway.grp                    | -30.1663    | 0.17    |
| yeast_ribose_deoxyribose_phosphate_metabolism.grp            | -30.8343    | 0.24    |
| yeast_deoxyribose_phosphate_metabolism.grp                   | -30.8343    | 0.24    |
| yeast_super_histidine_purine_pyrimidine_biosynth.grp         | -30.855     | 0.24    |
| yeast_histidine_biosynth.grp                                 | -30.855     | 0.24    |
| yeast_heme_biosynth.grp                                      | -31.0411    | 0.28    |
| yeast_super_histidine_purine_pyrimidine_biosynth.grp         | -31.6006    | 0.34    |
| yeast_serine_isocitrate_lyase_pathway.grp                    | -31.7506    | 0.35    |
| yeast_p_cymene_degradation.grp                               | -31.8726    | 0.35    |
| yeast_ribose_deoxyribose_phosphate_metabolism.grp            | -31.9519    | 0.38    |
| yeast_deoxyribose_phosphate_metabolism.grp                   | -31.9519    | 0.38    |
| yeast_serine_isocitrate_lyase_pathway.grp                    | -31.9651    | 0.38    |
| yeast_serine_isocitrate_lyase_pathway.grp                    | -32.1663    | 0.41    |
| yeast_super_histidine_purine_pyrimidine_biosynth.grp         | -32.2069    | 0.41    |
| yeast_histidine_biosynth.grp                                 | -32.2069    | 0.41    |
| yeast_glucose_fermentation.grp                               | -32.4162    | 0.45    |
| yeast_folic_acid_biosynth.grp                                | -32.4247    | 0.46    |
| yeast_mevlonate_pathway.grp                                  | -32.6346    | 0.48    |
| yeast_ergosterol_biosynth.grp                                | -32.6346    | 0.48    |
| yeast_super_histidine_purine_pyrimidine_biosynth.grp         | -32.855     | 0.51    |
| yeast_glycolysis.grp                                         | -32.8682    | 0.51    |
| yeast_heme_biosynth.grp                                      | -33.0411    | 0.56    |
| yeast_de_novo_pyrimidine_ribonuc_biosynth.grp                | -33.1452    | 0.56    |
| yeast_ribose_deoxyribose_phosphate_metabolism.grp            | -33.2863    | 0.57    |
| yeast_super_leucine_ileucine_valine_biosynth2.grp            | -33.3071    | 0.57    |
| yeast_ribose_deoxyribose_phosphate_metabolism.grp            | -33.3202    | 0.59    |
| yeast_deoxyribose_phosphate_metabolism.grp                   | -33.3202    | 0.59    |
| yeast_chorismate_biosynth.grp                                | -33.6895    | 0.6     |
| yeast_glucose_fermentation.grp                               | -33.7506    | 0.61    |
| yeast_p_cymene_degradation.grp                               | -33.8726    | 0.62    |
| yeast_ribose_deoxyribose_phosphate_metabolism.grp            | -33.9519    | 0.62    |
| yeast_deoxyribose_phosphate_metabolism.grp                   | -33.9519    | 0.62    |
| yeast_threonine_methionine_biosynth.grp                      | -34.0229    | 0.63    |
| yeast_super_leucine_ileucine_valine_biosynth1.grp            | -34.0452    | 0.64    |
| yeast_mevlonate_pathway.grp                                  | -34.0615    | 0.65    |

Click on a column name to sort table. Click on a row to view match.

## 7) yeast\_mevalonate\_pathway

| Match results                                        |             |         |
|------------------------------------------------------|-------------|---------|
| Text File Name                                       | Match Score | P-Value |
| yeast_mevalonate_pathway.grp                         | 0.0         | 0.0     |
| yeast_ergosterol_biosynth.grp                        | 0.0         | 0.0     |
| yeast_ergosterol_biosynth.grp                        | -38.6098    | 0.0     |
| yeast_ergosterol_biosynth.grp                        | -41.3963    | 0.0     |
| yeast_phenylalanine_tyrosine_tryptophan_biosynth.grp | -42.2995    | 0.02    |
| yeast_chorismate_pathway.grp                         | -42.2995    | 0.02    |
| yeast_mevalonate_pathway.grp                         | -42.6343    | 0.02    |
| yeast_glycolysis.grp                                 | -43.4268    | 0.05    |
| yeast_glucose_fermentation.grp                       | -43.4268    | 0.05    |
| yeast_phenylalanine_tyrosine_tryptophan_biosynth.grp | -44.2995    | 0.12    |
| yeast_chorismate_pathway.grp                         | -44.2995    | 0.12    |
| yeast_glycolysis.grp                                 | -45.4268    | 0.22    |
| yeast_glucose_fermentation.grp                       | -45.4268    | 0.22    |
| yeast_serine_isocitrate_lyase_pathway.grp            | -46.5481    | 0.36    |
| yeast_glucose_fermentation.grp                       | -46.5818    | 0.36    |
| yeast_glycolysis.grp                                 | -46.6058    | 0.36    |
| yeast_phenylalanine_tyrosine_tryptophan_biosynth.grp | -46.6758    | 0.36    |
| yeast_chorismate_pathway.grp                         | -46.6758    | 0.36    |
| yeast_ergosterol_biosynth.grp                        | -46.827     | 0.41    |
| yeast_chorismate_pathway.grp                         | -47.0314    | 0.45    |
| yeast_phenylalanine_tyrosine_tryptophan_biosynth.grp | -47.1278    | 0.46    |
| yeast_chorismate_pathway.grp                         | -47.1278    | 0.46    |
| yeast_phosphatidic_biosynth.grp                      | -47.2166    | 0.49    |
| yeast_phosphatidic_acid_phospholipid_biosynth.grp    | -47.2166    | 0.49    |
| yeast_phosphatidic_acid_phospholipid_biosynth.grp    | -47.2166    | 0.49    |
| yeast_ergosterol_biosynth.grp                        | -47.2785    | 0.5     |
| yeast_phenylalanine_tyrosine_tryptophan_biosynth.grp | -47.3025    | 0.5     |
| yeast_glucose_fermentation.grp                       | -47.4268    | 0.51    |
| yeast_glucose_fermentation.grp                       | -47.8198    | 0.59    |
| yeast_glycolysis.grp                                 | -47.8438    | 0.59    |
| yeast_glycolysis.grp                                 | -47.9063    | 0.59    |
| yeast_super_histidine_purine_pyrimidine_biosynth.grp | -47.9196    | 0.6     |
| yeast_super_histidine_purine_pyrimidine_biosynth.grp | -47.9298    | 0.6     |
| yeast_serine_isocitrate_lyase_pathway.grp            | -47.9447    | 0.6     |
| yeast_serine_isocitrate_lyase_pathway.grp            | -48.2064    | 0.63    |
| yeast_serine_isocitrate_lyase_pathway.grp            | -48.3069    | 0.63    |
| yeast_super_histidine_purine_pyrimidine_biosynth.grp | -48.3644    | 0.64    |
| yeast_de_novo_purine_nuc_biosynth.grp                | -48.3644    | 0.64    |
| yeast_phosphatidic_acid_phospholipid_biosynth.grp    | -48.4546    | 0.64    |
| yeast_serine_isocitrate_lyase_pathway.grp            | -48.5481    | 0.65    |
| yeast_phosphatidic_acid_phospholipid_biosynth.grp    | -49.1202    | 0.67    |
| yeast_phosphatidic_acid_phospholipid_biosynth.grp    | -49.1202    | 0.67    |
| yeast_folic_acid_biosynth.grp                        | -49.1202    | 0.67    |
| yeast_pantothenate_coenzymeA_biosynth.grp            | -49.1553    | 0.67    |
| yeast_super_histidine_purine_pyrimidine_biosynth.grp | -49.2303    | 0.67    |
| yeast_super_histidine_purine_pyrimidine_biosynth.grp | -49.2642    | 0.67    |
| yeast_de_novo_purine_nuc_biosynth.grp                | -49.6024    | 0.69    |
| yeast_pantothenate_coenzymeA_biosynth.grp            | -49.7074    | 0.71    |
| yeast_pantothenate_coenzymeA_biosynth.grp            | -49.7074    | 0.71    |
| yeast_pantothenate_coenzymeA_biosynth.grp            | -49.7483    | 0.71    |
| yeast_fatty_acid_biosynth.grp                        | -49.9471    | 0.72    |
| yeast_de_novo_purine_nuc_biosynth.grp                | -49.9471    | 0.72    |
| yeast_folic_acid_biosynth.grp                        | -50.0026    | 0.72    |
| yeast_TCA_cycle_aerobic_respiration.grp              | -50.3103    | 0.74    |
| yeast_de_novo_purine_nuc_biosynth.grp                | -50.3644    | 0.74    |

Click on a column name to sort table. Click on a row to view match.

## 8) yeast\_glycolysis

| Match results                                               |             |         |
|-------------------------------------------------------------|-------------|---------|
| Text File Name                                              | Match Score | P-Value |
| yeast_glycolysis.grp                                        | 0.0         | 0.0     |
| yeast_glucose_fermentation.grp                              | -3.49651    | 0.0     |
| yeast_glucose_fermentation.grp                              | -5.49651    | 0.0     |
| yeast_phenylalanine_tyrosine_tryptophan_biosynth.grp        | -57.6027    | 0.13    |
| yeast_chorismate_pathway.grp                                | -57.6027    | 0.13    |
| yeast_ergosterol_biosynth.grp                               | -58.6231    | 0.15    |
| yeast_chorismate_pathway.grp                                | -59.3068    | 0.21    |
| yeast_phenylalanine_tyrosine_tryptophan_biosynth.grp        | -59.6027    | 0.25    |
| yeast_chorismate_pathway.grp                                | -59.6027    | 0.25    |
| yeast_phenylalanine_tyrosine_tryptophan_biosynth.grp        | -60.1855    | 0.28    |
| yeast_chorismate_pathway.grp                                | -60.1855    | 0.28    |
| yeast_phenylalanine_tyrosine_tryptophan_biosynth.grp        | -60.1879    | 0.28    |
| yeast_chorismate_pathway.grp                                | -60.1879    | 0.28    |
| yeast_ergosterol_biosynth.grp                               | -61.6513    | 0.46    |
| yeast_phenylalanine_tyrosine_tryptophan_biosynth.grp        | -62.1855    | 0.52    |
| yeast_ergosterol_biosynth.grp                               | -63.0004    | 0.58    |
| yeast_super_histidine_purine_pyrimidine_biosynth.grp        | -63.7403    | 0.63    |
| yeast_ergosterol_biosynth.grp                               | -65.0004    | 0.66    |
| yeast_super_histidine_purine_pyrimidine_biosynth.grp        | -65.6538    | 0.7     |
| yeast_super_histidine_purine_pyrimidine_biosynth.grp        | -65.7403    | 0.7     |
| yeast_pantothenate_coenzymeA_biosynth.grp                   | -66.3234    | 0.72    |
| yeast_phosphatidic_acid_phospholipid_biosynth.grp           | -66.8865    | 0.75    |
| yeast_ergosterol_biosynth.grp                               | -67.0004    | 0.76    |
| yeast_super_phenylalanine_tyrosine_tryptophane_biosynth.grp | -67.0712    | 0.78    |
| yeast_super_histidine_purine_pyrimidine_biosynth.grp        | -67.1826    | 0.78    |
| yeast_super_histidine_purine_pyrimidine_biosynth.grp        | -67.6538    | 0.82    |
| yeast_de_novo_purine_nuc_biosynth.grp                       | -68.8265    | 0.83    |
| yeast_phosphatidic_acid_phospholipid_biosynth.grp           | -68.8889    | 0.85    |
| yeast_de_novo_purine_nuc_biosynth.grp                       | -69.6125    | 0.9     |
| yeast_de_novo_purine_nuc_biosynth.grp                       | -70.0645    | 0.9     |
| yeast_phosphatidic_acid_phospholipid_biosynth.grp           | -70.1269    | 0.9     |
| yeast_folic_acid_biosynth.grp                               | -70.2645    | 0.9     |
| yeast_folic_acid_biosynth.grp                               | -70.2645    | 0.9     |
| yeast_de_novo_purine_nuc_biosynth.grp                       | -70.8265    | 0.93    |
| yeast_de_novo_purine_nuc_biosynth.grp                       | -70.913     | 0.93    |
| yeast_ubiquinone_biosynth.grp                               | -71.4785    | 0.95    |
| yeast_phosphatidic_acid_phospholipid_biosynth.grp           | -71.4785    | 0.95    |
| yeast_phosphatidic_acid_phospholipid_biosynth.grp           | -71.4785    | 0.95    |
| yeast_folic_acid_biosynth.grp                               | -72.2645    | 0.97    |
| yeast_ubiquinone_biosynth.grp                               | -73.4785    | 0.99    |
| yeast_folic_acid_biosynth.grp                               | -73.9545    | 0.99    |
| yeast_folic_acid_biosynth.grp                               | -73.9545    | 0.99    |

Click on a column name to sort table. Click on a row to view match.

## 9) yeast\_aerobic\_glycerol\_catabolism

| Match results                                        |             |         |
|------------------------------------------------------|-------------|---------|
| Text File Name                                       | Match Score | P-Value |
| yeast_aerobic_glycerol_catabolism.grp                | 0.0         | 0.0     |
| yeast_glucose_fermentation.grp                       | -32.8687    | 0.0     |
| yeast_glucose_fermentation.grp                       | -57.6238    | 0.08    |
| yeast_glucose_fermentation.grp                       | -57.6421    | 0.08    |
| yeast_glucose_fermentation.grp                       | -59.6238    | 0.13    |
| yeast_glucose_fermentation.grp                       | -60.8643    | 0.18    |
| yeast_phenylalanine_tyrosine_tryptophan_biosynth.grp | -61.4097    | 0.2     |
| yeast_chorismate_pathway.grp                         | -61.4097    | 0.2     |
| yeast_phenylalanine_tyrosine_tryptophan_biosynth.grp | -61.7033    | 0.2     |
| yeast_chorismate_pathway.grp                         | -61.7033    | 0.2     |
| yeast_chorismate_pathway.grp                         | -63.0479    | 0.33    |
| yeast_phenylalanine_tyrosine_tryptophan_biosynth.grp | -63.4097    | 0.41    |
| yeast_chorismate_pathway.grp                         | -63.4097    | 0.41    |
| yeast_phenylalanine_tyrosine_tryptophan_biosynth.grp | -63.7033    | 0.41    |
| yeast_chorismate_pathway.grp                         | -63.7033    | 0.41    |
| yeast_ergosterol_biosynth.grp                        | -63.8808    | 0.42    |
| yeast_super_histidine_purine_pyrimidine_biosynth.grp | -63.8822    | 0.42    |
| yeast_super_histidine_purine_pyrimidine_biosynth.grp | -63.9638    | 0.44    |
| yeast_phenylalanine_tyrosine_tryptophan_biosynth.grp | -64.3484    | 0.47    |
| yeast_serine_isocitrate_lyase_pathway.grp            | -64.4969    | 0.49    |
| yeast_super_histidine_purine_pyrimidine_biosynth.grp | -64.5023    | 0.5     |
| yeast_super_histidine_purine_pyrimidine_biosynth.grp | -64.5332    | 0.5     |
| yeast_super_histidine_purine_pyrimidine_biosynth.grp | -64.8432    | 0.53    |
| yeast_p_cymene_degradation.grp                       | -65.2262    | 0.63    |
| yeast_ergosterol_biosynth.grp                        | -65.2299    | 0.63    |
| yeast_serine_isocitrate_lyase_pathway.grp            | -65.7373    | 0.64    |
| yeast_serine_isocitrate_lyase_pathway.grp            | -65.7373    | 0.64    |
| yeast_aerobic_glycerol_catabolism.grp                | -65.7373    | 0.64    |
| yeast_serine_isocitrate_lyase_pathway.grp            | -65.841     | 0.64    |
| yeast_TCA_cycle_aerobic_respiration.grp              | -66.0636    | 0.66    |
| yeast_ergosterol_biosynth.grp                        | -66.3931    | 0.73    |
| yeast_ergosterol_biosynth.grp                        | -66.4369    | 0.74    |
| yeast_ergosterol_biosynth.grp                        | -66.4703    | 0.75    |
| yeast_serine_isocitrate_lyase_pathway.grp            | -66.4993    | 0.76    |
| yeast_TCA_cycle_aerobic_respiration.grp              | -66.5266    | 0.76    |
| yeast_pantothenate_coenzymeA_biosynth.grp            | -66.7686    | 0.76    |
| yeast_de_novo_purine_nuc_biosynth.grp                | -66.83      | 0.77    |
| yeast_de_novo_purine_nuc_biosynth.grp                | -66.9675    | 0.78    |
| yeast_histidine_biosynth.grp                         | -67.1021    | 0.8     |
| yeast_p_cymene_degradation.grp                       | -67.2262    | 0.8     |
| yeast_TCA_cycle_aerobic_respiration.grp              | -67.2928    | 0.81    |
| yeast_de_novo_purine_nuc_biosynth.grp                | -67.475     | 0.82    |
| yeast_phosphatidic_biosynth.grp                      | -67.5374    | 0.82    |
| yeast_phosphatidic_acid_phospholipid_biosynth.grp    | -67.5374    | 0.82    |
| yeast_phosphatidic_acid_phospholipid_biosynth.grp    | -67.5374    | 0.82    |
| yeast_TCA_cycle_aerobic_respiration.grp              | -67.6032    | 0.82    |
| yeast_de_novo_purine_nuc_biosynth.grp                | -67.6125    | 0.82    |
| yeast_ubiquinone_biosynth.grp                        | -67.6395    | 0.82    |
| yeast_histidine_biosynth.grp                         | -67.8641    | 0.84    |
| yeast_histidine_biosynth.grp                         | -68.7819    | 0.88    |
| yeast_de_novo_purine_nuc_biosynth.grp                | -68.8265    | 0.89    |
| yeast_p_cymene_degradation.grp                       | -68.9016    | 0.91    |
| yeast_folic_acid_biosynth.grp                        | -68.9641    | 0.91    |
| yeast_folic_acid_biosynth.grp                        | -68.9641    | 0.91    |

Click on a column name to sort table. Click on a row to view match.



# 10) yeast\_phosphatidic\_biosynth

| Match results                                        |             |         |
|------------------------------------------------------|-------------|---------|
| Text File Name                                       | Match Score | P-Value |
| yeast_phosphatidic_biosynth.grp                      | 0.0         | 0.0     |
| yeast_phosphatidic_acid_phospholipid_biosynth.grp    | 0.0         | 0.0     |
| yeast_phosphatidic_acid_phospholipid_biosynth.grp    | -2.0        | 0.0     |
| yeast_phosphatidic_acid_phospholipid_biosynth.grp    | -4.0        | 0.0     |
| yeast_phosphatidic_acid_phospholipid_biosynth.grp    | -18.3744    | 0.0     |
| yeast_phosphatidic_acid_phospholipid_biosynth.grp    | -20.3744    | 0.0     |
| yeast_ergosterol_biosynth.grp                        | -59.9369    | 0.09    |
| yeast_phosphatidic_biosynth.grp                      | -60.7853    | 0.15    |
| yeast_ubiquinone_biosynth.grp                        | -62.4656    | 0.27    |
| yeast_glucose_fermentation.grp                       | -62.965     | 0.29    |
| yeast_ergosterol_biosynth.grp                        | -63.878     | 0.42    |
| yeast_chorismate_pathway.grp                         | -64.0073    | 0.45    |
| yeast_chorismate_pathway.grp                         | -64.2669    | 0.5     |
| yeast_super_histidine_purine_pyrimidine_biosynth.grp | -64.3954    | 0.51    |
| yeast_super_histidine_purine_pyrimidine_biosynth.grp | -64.3954    | 0.51    |
| yeast_de_novo_purine_nuc_biosynth.grp                | -64.4004    | 0.51    |
| yeast_de_novo_purine_nuc_biosynth.grp                | -64.45      | 0.53    |
| yeast_ubiquinone_biosynth.grp                        | -64.4656    | 0.53    |
| yeast_glucose_fermentation.grp                       | -65.0854    | 0.57    |
| yeast_chorismate_pathway.grp                         | -65.1493    | 0.58    |
| yeast_lipid_linked_oligosaccharide_biosynth.grp      | -65.2884    | 0.6     |
| yeast_chorismate_pathway.grp                         | -65.5049    | 0.6     |
| yeast_phenylalanine_tyrosine_tryptophan_biosynth.grp | -65.5546    | 0.6     |
| yeast_folic_acid_biosynth.grp                        | -65.5546    | 0.6     |
| yeast_chorismate_pathway.grp                         | -65.5546    | 0.6     |
| yeast_de_novo_purine_nuc_biosynth.grp                | -65.6334    | 0.63    |
| yeast_super_histidine_purine_pyrimidine_biosynth.grp | -65.7469    | 0.65    |
| yeast_super_histidine_purine_pyrimidine_biosynth.grp | -65.7469    | 0.65    |
| yeast_super_histidine_purine_pyrimidine_biosynth.grp | -65.8108    | 0.68    |
| yeast_ergosterol_biosynth.grp                        | -65.878     | 0.68    |
| yeast_serine_isocitrate_lyase_pathway.grp            | -66.2405    | 0.72    |
| yeast_histidine_biosynth.grp                         | -66.2574    | 0.73    |
| yeast_ergosterol_biosynth.grp                        | -66.2994    | 0.75    |
| yeast_ergosterol_biosynth.grp                        | -66.3825    | 0.75    |
| yeast_de_novo_purine_nuc_biosynth.grp                | -66.4004    | 0.75    |
| yeast_phenylalanine_tyrosine_tryptophan_biosynth.grp | -66.4369    | 0.78    |
| yeast_de_novo_purine_nuc_biosynth.grp                | -66.4369    | 0.78    |
| yeast_glucose_fermentation.grp                       | -66.4959    | 0.79    |
| yeast_histidine_biosynth.grp                         | -66.5008    | 0.79    |
| yeast_ubiquinone_biosynth.grp                        | -66.5264    | 0.79    |
| yeast_folic_acid_biosynth.grp                        | -66.9353    | 0.8     |
| yeast_glucose_fermentation.grp                       | -67.0854    | 0.82    |
| yeast_ubiquinone_biosynth.grp                        | -67.2884    | 0.82    |
| yeast_aerobic_glycerol_catabolism.grp                | -67.5374    | 0.84    |
| yeast_serine_isocitrate_lyase_pathway.grp            | -67.675     | 0.86    |
| yeast_glucose_fermentation.grp                       | -67.675     | 0.86    |
| yeast_phenylalanine_tyrosine_tryptophan_biosynth.grp | -67.7885    | 0.86    |
| yeast_phenylalanine_tyrosine_tryptophan_biosynth.grp | -68.4369    | 0.91    |
| yeast_pantothenate_coenzymeA_biosynth.grp            | -68.7754    | 0.92    |
| yeast_serine_isocitrate_lyase_pathway.grp            | -68.8301    | 0.92    |
| yeast_folic_acid_biosynth.grp                        | -68.8393    | 0.92    |
| yeast_phenylalanine_tyrosine_tryptophan_biosynth.grp | -68.8889    | 0.92    |

Click on a column name to sort table. Click on a row to view match.

# 11) yeast\_sulfate\_assimilation\_pathway2

| Match results                                        |             |         |
|------------------------------------------------------|-------------|---------|
| Text File Name                                       | Match Score | P-Value |
| yeast_sulfur_amino_acid_biosynth.grp                 | 0.0         | 0.0     |
| yeast_sulfate_assimilation_pathway2.grp              | 0.0         | 0.0     |
| yeast_sulfur_degradation.grp                         | -19.9897    | 0.0     |
| yeast_threonine_methionine_biosynth.grp              | -28.3278    | 0.08    |
| yeast_sulfur_amino_acid_biosynth.grp                 | -28.6916    | 0.1     |
| yeast_threonine_methionine_biosynth.grp              | -28.9787    | 0.13    |
| yeast_methionine_biosynth.grp                        | -28.9787    | 0.13    |
| yeast_sulfur_amino_acid_biosynth.grp                 | -29.5452    | 0.16    |
| yeast_threonine_biosynth.grp                         | -30.0773    | 0.18    |
| yeast_sulfur_amino_acid_biosynth.grp                 | -30.3926    | 0.22    |
| yeast_sulfur_amino_acid_biosynth.grp                 | -30.3926    | 0.22    |
| yeast_sulfur_degradation.grp                         | -31.7622    | 0.33    |
| yeast_phenylalanine_tyrosine_tryptophan_biosynth.grp | -32.855     | 0.44    |
| yeast_chorismate_pathway.grp                         | -32.855     | 0.44    |
| yeast_chorismate_biosynth.grp                        | -32.855     | 0.44    |
| yeast_sulfate_assimilation_pathway2.grp              | -32.8687    | 0.44    |
| yeast_de_novo_NAD_biosynth.grp                       | -33.0728    | 0.46    |
| yeast_threonine_methionine_biosynth.grp              | -33.4288    | 0.51    |
| yeast_TCA_cycle_aerobic_respiration.grp              | -33.8739    | 0.56    |
| yeast_phenylalanine_tyrosine_tryptophan_biosynth.grp | -33.8853    | 0.56    |
| yeast_chorismate_pathway.grp                         | -33.8853    | 0.56    |
| yeast_mevalonate_pathway.grp                         | -33.9554    | 0.57    |
| yeast_ergosterol_biosynth.grp                        | -33.9554    | 0.57    |
| yeast_phosphatidic_biosynth.grp                      | -34.3222    | 0.59    |
| yeast_phosphatidic_acid_phospholipid_biosynth.grp    | -34.3222    | 0.59    |
| yeast_super_histidine_purine_pyrimidine_biosynth.grp | -34.6063    | 0.62    |
| yeast_super_histidine_purine_pyrimidine_biosynth.grp | -34.6063    | 0.62    |
| yeast_de_novo_purine_nuc_biosynth.grp                | -34.6063    | 0.62    |
| yeast_de_novo_purine_nuc_biosynth.grp                | -34.6063    | 0.62    |
| yeast_mevalonate_pathway.grp                         | -34.7439    | 0.64    |
| yeast_ergosterol_biosynth.grp                        | -34.7439    | 0.64    |
| yeast_phosphatidic_acid_phospholipid_biosynth.grp    | -34.8039    | 0.68    |
| yeast_threonine_catabolism.grp                       | -34.8063    | 0.68    |
| yeast_phosphatidic_acid_phospholipid_biosynth.grp    | -34.8063    | 0.68    |
| yeast_phenylalanine_tyrosine_tryptophan_biosynth.grp | -34.855     | 0.69    |
| yeast_chorismate_pathway.grp                         | -34.855     | 0.69    |
| yeast_chorismate_biosynth.grp                        | -34.855     | 0.69    |
| yeast_de_novo_NAD_biosynth.grp                       | -35.0728    | 0.71    |
| yeast_TCA_cycle_aerobic_respiration.grp              | -35.1744    | 0.71    |
| yeast_phenylalanine_tyrosine_tryptophan_biosynth.grp | -35.1744    | 0.71    |
| yeast_glutamate_degradation7.grp                     | -35.1744    | 0.71    |
| yeast_fatty_acid_biosynth.grp                        | -35.1744    | 0.71    |
| yeast_chorismate_pathway.grp                         | -35.1744    | 0.71    |
| yeast_chorismate_biosynth.grp                        | -35.1744    | 0.71    |
| yeast_threonine_methionine_biosynth.grp              | -35.2445    | 0.71    |
| yeast_threonine_biosynth.grp                         | -35.2445    | 0.71    |
| yeast_salvage_pyrimidine_ribonuc_pathway.grp         | -35.2559    | 0.72    |
| yeast_phosphatidic_acid_phospholipid_biosynth.grp    | -35.2559    | 0.72    |
| yeast_serine_isocitrate_lyase_pathway.grp            | -35.3934    | 0.73    |
| yeast_phenylalanine_tyrosine_tryptophan_biosynth.grp | -35.3934    | 0.73    |
| yeast_chorismate_pathway.grp                         | -35.3934    | 0.73    |
| yeast_phosphatidic_biosynth.grp                      | -35.4548    | 0.73    |
| yeast_phosphatidic_acid_phospholipid_biosynth.grp    | -35.4548    | 0.73    |
| yeast_glycolysis.grp                                 | -35.8229    | 0.77    |
| yeast_glucose_fermentation.grp                       | -35.8229    | 0.77    |
| yeast_TCA_cycle_aerobic_respiration.grp              | -35.8739    | 0.77    |

Click on a column name to sort table. Click on a row to view match.



## 12) yeast\_ubiquinone\_Q\_prenylation

| Match results                                        |             |         |
|------------------------------------------------------|-------------|---------|
| Text File Name                                       | Match Score | P-Value |
| yeast_ubiquinone_Q_prenylation.grp                   | 0.0         | 0.0     |
| yeast_ubiquinone_biosynth.grp                        | 0.0         | 0.0     |
| yeast_ubiquinone_biosynth.grp                        | -2.0        | 0.0     |
| yeast_ubiquinone_biosynth.grp                        | -4.0        | 0.0     |
| yeast_ubiquinone_biosynth.grp                        | -6.0        | 0.0     |
| yeast_ubiquinone_biosynth.grp                        | -8.0        | 0.0     |
| yeast_ergosterol_biosynth.grp                        | -38.1796    | 0.31    |
| yeast_carbon_monoxide_dehydrogenase.grp              | -38.5474    | 0.32    |
| yeast_sulfur_amino_acid_biosynth.grp                 | -39.2492    | 0.41    |
| yeast_ergosterol_biosynth.grp                        | -40.1796    | 0.46    |
| yeast_phosphatidic_biosynth.grp                      | -40.2901    | 0.46    |
| yeast_phosphatidic_acid_phospholipid_biosynth.grp    | -40.2901    | 0.46    |
| yeast_carbon_monoxide_dehydrogenase.grp              | -40.5474    | 0.47    |
| yeast_arginine_metabolism.grp                        | -41.1465    | 0.5     |
| yeast_sulfur_amino_acid_biosynth.grp                 | -41.2492    | 0.5     |
| yeast_ergosterol_biosynth.grp                        | -41.6788    | 0.53    |
| yeast_methionine_degradation.grp                     | -41.7877    | 0.53    |
| yeast_ergosterol_biosynth.grp                        | -42.1796    | 0.56    |
| yeast_threonine_methionine_biosynth.grp              | -42.2581    | 0.57    |
| yeast_threonine_methionine_biosynth.grp              | -42.2581    | 0.57    |
| yeast_sulfur_amino_acid_biosynth.grp                 | -42.2581    | 0.57    |
| yeast_methionine_biosynth.grp                        | -42.2581    | 0.57    |
| yeast_phosphatidic_biosynth.grp                      | -42.2901    | 0.58    |
| yeast_phosphatidic_acid_phospholipid_biosynth.grp    | -42.2901    | 0.58    |
| yeast_phosphatidic_acid_phospholipid_biosynth.grp    | -42.2901    | 0.58    |
| yeast_phosphatidic_biosynth.grp                      | -42.3205    | 0.58    |
| yeast_phosphatidic_acid_phospholipid_biosynth.grp    | -42.3205    | 0.58    |
| yeast_phosphatidic_acid_phospholipid_biosynth.grp    | -42.3205    | 0.58    |
| yeast_super_histidine_purine_pyrimidine_biosynth.grp | -42.3845    | 0.58    |
| yeast_super_histidine_purine_pyrimidine_biosynth.grp | -42.3845    | 0.58    |
| yeast_super_histidine_purine_pyrimidine_biosynth.grp | -42.3845    | 0.58    |
| yeast_arginine_metabolism.grp                        | -42.3845    | 0.58    |
| yeast_super_histidine_purine_pyrimidine_biosynth.grp | -42.4805    | 0.59    |
| yeast_super_histidine_purine_pyrimidine_biosynth.grp | -42.4805    | 0.59    |
| yeast_phenylalanine_tyrosine_tryptophan_biosynth.grp | -42.5177    | 0.59    |
| yeast_ergosterol_biosynth.grp                        | -42.5177    | 0.59    |
| yeast_chorismate_pathway.grp                         | -42.5177    | 0.59    |
| yeast_chorismate_biosynth.grp                        | -42.5177    | 0.59    |
| yeast_de_novo_pyrimidine_deoxynuc_biosynth.grp       | -43.0201    | 0.68    |
| yeast_chorismate_pathway.grp                         | -43.3757    | 0.7     |
| yeast_carbon_monoxide_dehydrogenase.grp              | -43.4961    | 0.7     |
| yeast_phosphatidic_biosynth.grp                      | -43.5586    | 0.72    |
| yeast_phosphatidic_biosynth.grp                      | -43.5586    | 0.72    |
| yeast_folic_acid_biosynth.grp                        | -43.6225    | 0.72    |
| yeast_folic_acid_biosynth.grp                        | -43.6225    | 0.72    |
| yeast_chorismate_pathway.grp                         | -43.6225    | 0.72    |
| yeast_de_novo_purine_nuc_biosynth.grp                | -43.685     | 0.73    |
| yeast_folic_acid_biosynth.grp                        | -43.7557    | 0.73    |
| yeast_chorismate_pathway.grp                         | -43.7557    | 0.73    |
| yeast_phenylalanine_tyrosine_tryptophan_biosynth.grp | -43.8181    | 0.74    |
| yeast_folic_acid_biosynth.grp                        | -43.8181    | 0.74    |
| yeast_chorismate_pathway.grp                         | -43.8181    | 0.74    |
| yeast_p_cymene_degradation.grp                       | -43.8797    | 0.74    |
| yeast_p_cymene_degradation.grp                       | -43.8797    | 0.74    |
| yeast_de_novo_NAD_biosynth.grp                       | -44.2173    | 0.75    |
| yeast_cerebis_glucose_metabolism.grp                 | -44.2281    | 0.75    |

Click on a column name to sort table. Click on a row to view match.

### 13) yeast\_hexaprenyl\_diphosphate\_biosynth

| Match results                                        |             |         |
|------------------------------------------------------|-------------|---------|
| Text File Name                                       | Match Score | P-Value |
| yeast_ubiquinone_biosynth.grp                        | 0.0         | 0.0     |
| yeast_hexaprenyl_diphosphate_biosynth.grp            | 0.0         | 0.0     |
| yeast_ubiquinone_biosynth.grp                        | -11.9109    | 0.0     |
| yeast_ubiquinone_biosynth.grp                        | -11.9109    | 0.0     |
| yeast_ubiquinone_biosynth.grp                        | -13.9109    | 0.0     |
| yeast_ergosterol_biosynth.grp                        | -15.1963    | 0.0     |
| yeast_hexaprenyl_diphosphate_biosynth.grp            | -15.8812    | 0.0     |
| yeast_ergosterol_biosynth.grp                        | -17.1963    | 0.0     |
| yeast_ubiquinone_biosynth.grp                        | -18.89      | 0.0     |
| yeast_ergosterol_biosynth.grp                        | -19.1666    | 0.0     |
| yeast_ergosterol_biosynth.grp                        | -19.1963    | 0.01    |
| yeast_ergosterol_biosynth.grp                        | -19.9286    | 0.01    |
| yeast_ubiquinone_Q_prenylation.grp                   | -22.1755    | 0.04    |
| yeast_thiamine_biosynth.grp                          | -24.9077    | 0.21    |
| yeast_ubiquinone_Q_prenylation.grp                   | -26.1458    | 0.26    |
| yeast_riboflavin_FMN_FAD_biosynth.grp                | -26.1458    | 0.26    |
| yeast_riboflavin_FMN_FAD_biosynth.grp                | -26.1458    | 0.26    |
| yeast_chorismate_pathway.grp                         | -26.3749    | 0.39    |
| yeast_chorismate_pathway.grp                         | -26.3749    | 0.39    |
| yeast_chorismate_pathway.grp                         | -27.1369    | 0.4     |
| yeast_chorismate_pathway.grp                         | -27.1369    | 0.4     |
| yeast_sulfur_amino_acid_biosynth.grp                 | -27.3838    | 0.4     |
| yeast_phenylalanine_tyrosine_tryptophan_biosynth.grp | -27.3838    | 0.4     |
| yeast_methionine_degradation.grp                     | -27.3838    | 0.4     |
| yeast_methionine_degradation.grp                     | -27.3838    | 0.4     |
| yeast_folic_acid_biosynth.grp                        | -27.3838    | 0.4     |
| yeast_chorismate_pathway.grp                         | -27.3838    | 0.4     |
| yeast_chorismate_biosynth.grp                        | -27.3838    | 0.4     |
| yeast_phosphatidic_acid_phospholipid_biosynth.grp    | -27.9166    | 0.49    |
| yeast_lipid_linked_oligosaccharide_biosynth.grp      | -27.9166    | 0.49    |

Click on a column name to sort table. Click on a row to view match.

#### 14) yeast\_deoxyribose\_phosphate\_metabolism

| Match results                                               |             |         |
|-------------------------------------------------------------|-------------|---------|
| Text File Name                                              | Match Score | P-Value |
| yeast_ribose_deoxyribose_phosphate_metabolism.grp           | 0.0         | 0.0     |
| yeast_deoxyribose_phosphate_metabolism.grp                  | 0.0         | 0.0     |
| yeast_ribose_deoxyribose_phosphate_metabolism.grp           | -49.303     | 0.07    |
| yeast_deoxyribose_phosphate_metabolism.grp                  | -49.303     | 0.07    |
| yeast_super_histidine_purine_pyrimidine_biosynth.grp        | -50.4466    | 0.11    |
| yeast_super_phenylalanine_tyrosine_tryptophane_biosynth.grp | -52.0718    | 0.14    |
| yeast_super_histidine_purine_pyrimidine_biosynth.grp        | -52.6914    | 0.18    |
| yeast_super_histidine_purine_pyrimidine_biosynth.grp        | -53.3628    | 0.2     |
| yeast_histidine_biosynth.grp                                | -53.3628    | 0.2     |
| yeast_aerobic_glycerol_catabolism.grp                       | -54.1534    | 0.26    |
| yeast_glucose_fermentation.grp                              | -54.6261    | 0.3     |
| yeast_super_histidine_purine_pyrimidine_biosynth.grp        | -54.6914    | 0.31    |
| yeast_phenylalanine_tyrosine_tryptophan_biosynth.grp        | -54.9542    | 0.38    |
| yeast_chorismate_pathway.grp                                | -54.9542    | 0.38    |
| yeast_de_novo_purine_nuc_biosynth.grp                       | -55.042     | 0.41    |
| yeast_super_histidine_purine_pyrimidine_biosynth.grp        | -55.0528    | 0.43    |
| yeast_serine_isocitrate_lyase_pathway.grp                   | -55.2504    | 0.43    |
| yeast_aerobic_glycerol_catabolism.grp                       | -55.3915    | 0.43    |
| yeast_de_novo_purine_nuc_biosynth.grp                       | -55.6737    | 0.46    |
| yeast_chorismate_pathway.grp                                | -55.6737    | 0.46    |
| yeast_histidine_biosynth.grp                                | -55.9691    | 0.47    |
| yeast_chorismate_pathway.grp                                | -56.015     | 0.48    |
| yeast_phenylalanine_tyrosine_tryptophan_biosynth.grp        | -56.1475    | 0.48    |
| yeast_chorismate_pathway.grp                                | -56.1475    | 0.48    |
| yeast_aerobic_glycerol_catabolism.grp                       | -56.1534    | 0.48    |
| yeast_histidine_biosynth.grp                                | -56.2788    | 0.5     |
| yeast_phenylalanine_tyrosine_tryptophan_biosynth.grp        | -56.5479    | 0.55    |
| yeast_chorismate_pathway.grp                                | -56.5479    | 0.55    |
| yeast_phenylalanine_tyrosine_tryptophan_biosynth.grp        | -56.7336    | 0.56    |
| yeast_de_novo_purine_nuc_biosynth.grp                       | -57.042     | 0.58    |
| yeast_serine_isocitrate_lyase_pathway.grp                   | -57.2504    | 0.6     |
| yeast_glycolysis.grp                                        | -57.3467    | 0.62    |
| yeast_glucose_fermentation.grp                              | -57.3467    | 0.62    |
| yeast_serine_isocitrate_lyase_pathway.grp                   | -57.3708    | 0.62    |
| yeast_aerobic_glycerol_catabolism.grp                       | -57.3915    | 0.62    |
| yeast_phosphatidic_biosynth.grp                             | -57.4013    | 0.62    |
| yeast_phosphatidic_acid_phospholipid_biosynth.grp           | -57.4013    | 0.62    |
| yeast_folic_acid_biosynth.grp                               | -57.606     | 0.63    |
| yeast_super_phenylalanine_tyrosine_tryptophane_biosynth.grp | -57.8822    | 0.63    |
| yeast_phenylalanine_tyrosine_tryptophan_biosynth.grp        | -57.9717    | 0.64    |
| yeast_serine_isocitrate_lyase_pathway.grp                   | -58.1328    | 0.64    |
| yeast_histidine_biosynth.grp                                | -58.2788    | 0.65    |
| yeast_de_novo_purine_nuc_biosynth.grp                       | -58.4004    | 0.65    |
| yeast_glycolysis.grp                                        | -58.5847    | 0.66    |
| yeast_glucose_fermentation.grp                              | -58.5847    | 0.66    |
| yeast_ergosterol_biosynth.grp                               | -58.5995    | 0.66    |
| yeast_phosphatidic_acid_phospholipid_biosynth.grp           | -58.6889    | 0.67    |
| yeast_phosphatidic_acid_phospholipid_biosynth.grp           | -58.6889    | 0.67    |
| yeast_lipid_linked_oligosaccharide_biosynth.grp             | -59.1786    | 0.73    |
| yeast_serine_isocitrate_lyase_pathway.grp                   | -59.2504    | 0.73    |
| yeast_glucose_fermentation.grp                              | -59.3467    | 0.73    |
| yeast_phosphatidic_acid_phospholipid_biosynth.grp           | -59.4042    | 0.73    |

Click on a column name to sort table. Click on a row to view match.

# 15) yeast\_ribose\_catabolism

| Match results                                            |             |         |
|----------------------------------------------------------|-------------|---------|
| Text File Name                                           | Match Score | P-Value |
| yeast_ribose_catabolism.grp                              | 0.0         | 0.0     |
| yeast_pentose_phosphate_pathway.grp                      | -10.2172    | 0.0     |
| yeast_non_oxidative_branch_pentose_phosphate_pathw...    | -10.2172    | 0.0     |
| yeast_ribose_deoxyribose_phosphate_metabolism.grp        | -13.241     | 0.0     |
| yeast_deoxyribose_phosphate_metabolism.grp               | -13.241     | 0.0     |
| yeast_pentose_phosphate_pathway.grp                      | -13.9489    | 0.01    |
| yeast_non_oxidative_branch_pentose_phosphate_pathw...    | -13.9489    | 0.01    |
| yeast_ribose_deoxyribose_phosphate_metabolism.grp        | -13.9583    | 0.01    |
| yeast_xylulose_monophosphate_cycle.grp                   | -15.1398    | 0.01    |
| yeast_super_gluconate_utilization.grp                    | -15.1963    | 0.02    |
| yeast_ribose_deoxyribose_phosphate_metabolism.grp        | -15.1963    | 0.02    |
| yeast_ribose_deoxyribose_phosphate_metabolism.grp        | -15.241     | 0.06    |
| yeast_deoxyribose_phosphate_metabolism.grp               | -15.241     | 0.06    |
| yeast_pentose_phosphate_pathway.grp                      | -15.9489    | 0.07    |
| yeast_non_oxidative_branch_pentose_phosphate_pathw...    | -15.9489    | 0.07    |
| yeast_glycolysis.grp                                     | -16.2384    | 0.07    |
| yeast_glucose_fermentation.grp                           | -16.2384    | 0.07    |
| yeast_ribose_deoxyribose_phosphate_metabolism.grp        | -16.4343    | 0.07    |
| yeast_pentose_phosphate_pathway.grp                      | -16.4343    | 0.07    |
| yeast_deoxyribose_phosphate_metabolism.grp               | -16.4343    | 0.07    |
| yeast_lactose_degradation.grp                            | -16.9798    | 0.09    |
| yeast_galactose_metabolism.grp                           | -16.9798    | 0.09    |
| yeast_galactose_metabolism.grp                           | -16.9798    | 0.09    |
| yeast_super_histidine_purine_pyrimidine_biosynth.grp     | -17.0028    | 0.1     |
| yeast_trehalose_anabolism.grp                            | -17.6306    | 0.14    |
| yeast_sucrose_biosynth.grp                               | -17.6306    | 0.14    |
| yeast_strach_cellulose_biosynth.grp                      | -17.6306    | 0.14    |
| yeast_mannose_GDP_mannose_degradation.grp                | -17.6306    | 0.14    |
| yeast_lactose_degradation.grp                            | -17.6306    | 0.14    |
| yeast_galactose_metabolism.grp                           | -17.6306    | 0.14    |
| yeast_colanic_acid_building_blocks_biosynth2.grp         | -17.6306    | 0.14    |
| yeast_sucrose_biosynth.grp                               | -17.6513    | 0.17    |
| yeast_mannose_GDP_mannose_degradation.grp                | -17.6513    | 0.17    |
| yeast_pentose_phosphate_pathway.grp                      | -17.9489    | 0.17    |
| yeast_serine_isocitrate_lyase_pathway.grp                | -18.2178    | 0.18    |
| yeast_galactose_metabolism.grp                           | -18.2178    | 0.18    |
| yeast_glycolysis.grp                                     | -18.2384    | 0.18    |
| yeast_glucose_fermentation.grp                           | -18.2384    | 0.18    |
| yeast_glucose_fermentation.grp                           | -18.2384    | 0.18    |
| yeast_aerobic_glycerol_catabolism.grp                    | -18.2384    | 0.18    |
| yeast_tryptophan_biosynth.grp                            | -18.2408    | 0.18    |
| yeast_super_phenylalanine_tyrosine_tryptophane_biosyn... | -18.2408    | 0.18    |
| yeast_sucrose_biosynth.grp                               | -18.2408    | 0.18    |
| yeast_phenylalanine_tyrosine_tryptophan_biosynth.grp     | -18.2408    | 0.18    |
| yeast_histidine_biosynth.grp                             | -18.2408    | 0.18    |
| yeast_glycolysis.grp                                     | -18.2408    | 0.18    |
| yeast_glucose_fermentation.grp                           | -18.2408    | 0.18    |
| yeast_colanic_acid_building_blocks_biosynth1.grp         | -18.2408    | 0.18    |
| yeast_chorismate_pathway.grp                             | -18.2408    | 0.18    |
| yeast_aerobic_glycerol_catabolism.grp                    | -18.2408    | 0.18    |
| yeast_aerobic_glycerol_catabolism.grp                    | -18.2408    | 0.18    |
| yeast_mevalonate_pathway.grp                             | -18.3444    | 0.21    |
| yeast_ergosterol_biosynth.grp                            | -18.3444    | 0.21    |
| yeast_deoxyribose_phosphate_metabolism.grp               | -18.4343    | 0.21    |
| yeast_UDP_N_acetylglactosamine_biosynth.grp              | -18.8687    | 0.21    |
| yeast_UDP_N_acetylglactosamine_biosynth.grp              | -18.8687    | 0.21    |

Click on a column name to sort table. Click on a row to view match.

# 16) yeast\_super\_phenylalanine\_tyrosine\_biosynth

| Match results                                               |             |         |
|-------------------------------------------------------------|-------------|---------|
| Text File Name                                              | Match Score | P-Value |
| yeast_super_phenylalanine_tyrosine_tryptophane_biosynth.grp | 0.0         | 0.0     |
| yeast_super_phenylalanine_tyrosine_biosynth.grp             | 0.0         | 0.0     |
| yeast_phenylalanine_tyrosine_tryptophan_biosynth.grp        | 0.0         | 0.0     |
| yeast_chorismate_pathway.grp                                | 0.0         | 0.0     |
| yeast_phenylalanine_tyrosine_tryptophan_biosynth.grp        | -2.0        | 0.0     |
| yeast_chorismate_pathway.grp                                | -2.0        | 0.0     |
| yeast_phenylalanine_tyrosine_tryptophan_biosynth.grp        | -12.7443    | 0.0     |
| yeast_chorismate_pathway.grp                                | -12.7443    | 0.0     |
| yeast_phenylalanine_tyrosine_tryptophan_biosynth.grp        | -13.9824    | 0.0     |
| yeast_chorismate_pathway.grp                                | -13.9824    | 0.0     |
| yeast_phenylalanine_tyrosine_tryptophan_biosynth.grp        | -14.7443    | 0.0     |
| yeast_chorismate_pathway.grp                                | -14.7443    | 0.0     |
| yeast_serine_isocitrate_lyase_pathway.grp                   | -29.4768    | 0.14    |
| yeast_super_leucine_ileucine_valine_biosynth1.grp           | -30.1981    | 0.19    |
| yeast_ergosterol_biosynth.grp                               | -31.2247    | 0.25    |
| yeast_serine_isocitrate_lyase_pathway.grp                   | -31.4768    | 0.25    |
| yeast_glycolysis.grp                                        | -31.4797    | 0.25    |
| yeast_glucose_fermentation.grp                              | -31.4797    | 0.25    |
| yeast_aerobic_glycerol_catabolism.grp                       | -31.4797    | 0.25    |
| yeast_ribose_deoxyribose_phosphate_metabolism.grp           | -31.496     | 0.26    |
| yeast_deoxyribose_phosphate_metabolism.grp                  | -31.496     | 0.26    |
| yeast_super_leucine_ileucine_valine_biosynth1.grp           | -31.4985    | 0.26    |
| yeast_glycolysis.grp                                        | -32.1792    | 0.34    |
| yeast_glucose_fermentation.grp                              | -32.1792    | 0.34    |
| yeast_aerobic_glycerol_catabolism.grp                       | -32.1792    | 0.34    |
| yeast_super_histidine_purine_pyrimidine_biosynth.grp        | -32.2457    | 0.35    |
| yeast_histidine_biosynth.grp                                | -32.2457    | 0.35    |
| yeast_UDP_N_acetylglactosamine_biosynth.grp                 | -32.4835    | 0.37    |
| yeast_UDP_N_acetylglactosamine_biosynth.grp                 | -32.4835    | 0.37    |
| yeast_super_histidine_purine_pyrimidine_biosynth.grp        | -32.6135    | 0.37    |
| yeast_serine_isocitrate_lyase_pathway.grp                   | -32.7177    | 0.38    |
| yeast_glycolysis.grp                                        | -32.9412    | 0.41    |
| yeast_glucose_fermentation.grp                              | -32.9412    | 0.41    |
| yeast_super_histidine_purine_pyrimidine_biosynth.grp        | -33.0077    | 0.41    |
| yeast_histidine_biosynth.grp                                | -33.0077    | 0.41    |
| yeast_ergosterol_biosynth.grp                               | -33.1028    | 0.41    |
| yeast_super_phenylalanine_tyrosine_tryptophane_biosynth.grp | -33.2234    | 0.42    |
| yeast_ergosterol_biosynth.grp                               | -33.2247    | 0.42    |
| yeast_super_leucine_ileucine_valine_biosynth1.grp           | -33.3929    | 0.42    |
| yeast_super_leucine_ileucine_valine_biosynth2.grp           | -33.439     | 0.43    |
| yeast_super_ileucine_valine_biosynth1.grp                   | -33.439     | 0.43    |
| yeast_super_histidine_purine_pyrimidine_biosynth.grp        | -33.439     | 0.43    |
| yeast_super_histidine_purine_pyrimidine_biosynth.grp        | -33.439     | 0.43    |
| yeast_ileucine_biosynth.grp                                 | -33.439     | 0.43    |
| yeast_histidine_biosynth.grp                                | -33.439     | 0.43    |
| yeast_heme_biosynth.grp                                     | -33.8352    | 0.47    |
| yeast_de_novo_pyrimidine_ribonuc_biosynth.grp               | -33.8515    | 0.48    |
| yeast_threonine_methionine_biosynth.grp                     | -33.9364    | 0.49    |
| yeast_sulfur_amino_acid_biosynth.grp                        | -33.9364    | 0.49    |
| yeast_starch_cellulose_biosynth.grp                         | -33.948     | 0.49    |
| yeast_ribose_deoxyribose_phosphate_metabolism.grp           | -33.948     | 0.49    |
| yeast_deoxyribose_phosphate_metabolism.grp                  | -33.948     | 0.49    |
| yeast_arginine_ornithine_proline_interconversion.grp        | -33.9521    | 0.49    |
| yeast_arginine_ornithine_proline_interconversion.grp        | -33.9521    | 0.49    |
| yeast_aerobic_glycerol_catabolism.grp                       | -34.1161    | 0.49    |
| yeast_aerobic_glycerol_catabolism.grp                       | -34.1161    | 0.49    |

Click on a column name to sort table. Click on a row to view match.

## 17) yeast\_tyrosine\_biosynth

| Text File Name                                              | Match Score | P-Value |
|-------------------------------------------------------------|-------------|---------|
| yeast_tyrosine_biosynth.grp                                 | 0.0         | 0.0     |
| yeast_super_phenylalanine_tyrosine_tryptophane_biosynth.grp | 0.0         | 0.0     |
| yeast_super_phenylalanine_tyrosine_biosynth.grp             | 0.0         | 0.0     |
| yeast_phenylalanine_tyrosine_tryptophan_biosynth.grp        | 0.0         | 0.0     |
| yeast_chorismate_pathway.grp                                | 0.0         | 0.0     |
| yeast_phenylalanine_tyrosine_tryptophan_biosynth.grp        | -2.0        | 0.0     |
| yeast_chorismate_pathway.grp                                | -2.0        | 0.0     |
| yeast_phenylalanine_tyrosine_tryptophan_biosynth.grp        | -4.0        | 0.0     |
| yeast_chorismate_pathway.grp                                | -4.0        | 0.0     |
| yeast_phenylalanine_tyrosine_tryptophan_biosynth.grp        | -6.0        | 0.0     |
| yeast_chorismate_pathway.grp                                | -6.0        | 0.0     |
| yeast_phenylalanine_tyrosine_tryptophan_biosynth.grp        | -8.0        | 0.0     |
| yeast_chorismate_pathway.grp                                | -8.0        | 0.0     |
| yeast_ergosterol_biosynth.grp                               | -16.0284    | 0.09    |
| yeast_UDP_N_acetylglactosamine_biosynth.grp                 | -16.0492    | 0.09    |
| yeast_arginine_ornithine_proline_interconversion.grp        | -16.2173    | 0.09    |
| yeast_tyrosine_biosynth.grp                                 | -16.4343    | 0.1     |
| yeast_super_phenylalanine_tyrosine_tryptophane_biosynth.grp | -16.4343    | 0.1     |
| yeast_super_phenylalanine_tyrosine_biosynth.grp             | -16.4343    | 0.1     |
| yeast_phenylalanine_degradation.grp                         | -16.4343    | 0.1     |
| yeast_ergosterol_biosynth.grp                               | -16.6684    | 0.12    |
| yeast_serine_isocitrate_lyase_pathway.grp                   | -16.7487    | 0.13    |
| yeast_arginine_ornithine_proline_interconversion.grp        | -17.5177    | 0.16    |
| yeast_fatty_acid_oxidation.grp                              | -17.9139    | 0.16    |
| yeast_fatty_acid_oxidation.grp                              | -17.9139    | 0.16    |
| yeast_ergosterol_biosynth.grp                               | -18.0284    | 0.18    |
| yeast_arginine_ornithine_proline_interconversion.grp        | -18.2173    | 0.18    |
| yeast_super_phenylalanine_tyrosine_tryptophane_biosynth.grp | -18.4343    | 0.18    |
| yeast_super_phenylalanine_tyrosine_biosynth.grp             | -18.4343    | 0.18    |
| yeast_ergosterol_biosynth.grp                               | -18.6684    | 0.2     |
| yeast_serine_isocitrate_lyase_pathway.grp                   | -18.7487    | 0.2     |
| yeast_trehalose_anabolism.grp                               | -18.7517    | 0.2     |
| yeast_sucrose_biosynth.grp                                  | -18.7517    | 0.2     |
| yeast_strach_cellulose_biosynth.grp                         | -18.7517    | 0.2     |
| yeast_ribose_deoxyribose_phosphate_metabolism.grp           | -18.7517    | 0.2     |
| yeast_ribose_deoxyribose_phosphate_metabolism.grp           | -18.7517    | 0.2     |
| yeast_ribose_deoxyribose_phosphate_metabolism.grp           | -18.7517    | 0.2     |
| yeast_mannose_GDP_mannose_degradation.grp                   | -18.7517    | 0.2     |
| yeast_glycolysis.grp                                        | -18.7517    | 0.2     |
| yeast_glycogen_catabolism.grp                               | -18.7517    | 0.2     |
| yeast_glucose_fermentation.grp                              | -18.7517    | 0.2     |
| yeast_galactose_metabolism.grp                              | -18.7517    | 0.2     |
| yeast_deoxyribose_phosphate_metabolism.grp                  | -18.7517    | 0.2     |
| yeast_deoxyribose_phosphate_metabolism.grp                  | -18.7517    | 0.2     |
| yeast_aerobic_glycerol_catabolism.grp                       | -18.7517    | 0.2     |
| yeast_super_gluconate_utilization.grp                       | -18.9197    | 0.22    |
| yeast_aerobic_glycerol_catabolism.grp                       | -18.9197    | 0.22    |
| yeast_aerobic_glycerol_catabolism.grp                       | -18.9197    | 0.22    |
| yeast_methionine_degradation.grp                            | -19.2069    | 0.23    |
| yeast_super_leucine_isonoleucine_valine_biosynth1.grp       | -19.4105    | 0.24    |
| yeast_lysinase_biosynth.grp                                 | -19.4105    | 0.24    |
| yeast_lysinase_biosynth.grp                                 | -19.4105    | 0.24    |
| yeast_leucine_biosynth.grp                                  | -19.4105    | 0.24    |
| yeast_glutamate_degradation8.grp                            | -19.4105    | 0.24    |
| yeast_glutamate_degradation7.grp                            | -19.4105    | 0.24    |
| yeast_ectoine_synth.grp                                     | -19.4105    | 0.24    |

Click on a column name to sort table. Click on a row to view match.



# 18) yeast\_glutamate\_degradation8

| Match results                                        |             |         |
|------------------------------------------------------|-------------|---------|
| Text File Name                                       | Match Score | P-Value |
| yeast_glutamate_degradation8.grp                     | 0.0         | 0.0     |
| yeast_arginine_metabolism.grp                        | 0.0         | 0.0     |
| yeast_glutamate_degradation8.grp                     | -24.158     | 0.0     |
| yeast_arginine_metabolism.grp                        | -24.158     | 0.0     |
| yeast_glycolysis.grp                                 | -30.0415    | 0.13    |
| yeast_glucose_fermentation.grp                       | -30.0415    | 0.13    |
| yeast_glycolysis.grp                                 | -31.2795    | 0.17    |
| yeast_glucose_fermentation.grp                       | -31.2795    | 0.17    |
| yeast_aerobic_glycerol_catabolism.grp                | -31.2795    | 0.17    |
| yeast_arginine_metabolism.grp                        | -31.6307    | 0.19    |
| yeast_serine_isocitrate_lyase_pathway.grp            | -32.0173    | 0.22    |
| yeast_glycolysis.grp                                 | -32.0415    | 0.23    |
| yeast_glucose_fermentation.grp                       | -32.0415    | 0.23    |
| yeast_aerobic_glycerol_catabolism.grp                | -32.0415    | 0.23    |
| yeast_arginine_metabolism.grp                        | -32.3926    | 0.25    |
| yeast_glucose_fermentation.grp                       | -32.8035    | 0.28    |
| yeast_sulfur_amino_acid_biosynth.grp                 | -32.8405    | 0.29    |
| yeast_mevalonate_pathway.grp                         | -32.8405    | 0.29    |
| yeast_ergosterol_biosynth.grp                        | -32.8405    | 0.29    |
| yeast_triglyceride_biosynth.grp                      | -33.0237    | 0.34    |
| yeast_threonine_catabolism.grp                       | -33.6132    | 0.38    |
| yeast_fatty_acid_biosynth.grp                        | -33.6132    | 0.38    |
| yeast_fatty_acid_biosynth.grp                        | -33.6132    | 0.38    |
| yeast_aerobic_glycerol_catabolism.grp                | -34.0415    | 0.41    |
| yeast_glycolysis.grp                                 | -34.1156    | 0.43    |
| yeast_glucose_fermentation.grp                       | -34.1156    | 0.43    |
| yeast_aerobic_glycerol_catabolism.grp                | -34.1156    | 0.43    |
| yeast_phosphatidic_acid_phospholipid_biosynth.grp    | -34.141     | 0.43    |
| yeast_phosphatidic_acid_phospholipid_biosynth.grp    | -34.141     | 0.43    |
| yeast_sulfur_amino_acid_biosynth.grp                 | -34.192     | 0.45    |
| yeast_mevalonate_pathway.grp                         | -34.192     | 0.45    |
| yeast_ergosterol_biosynth.grp                        | -34.192     | 0.45    |
| yeast_triglyceride_biosynth.grp                      | -34.3752    | 0.46    |
| yeast_glycolysis.grp                                 | -34.5358    | 0.48    |
| yeast_super_histidine_purine_pyrimidine_biosynth.grp | -34.6693    | 0.5     |
| yeast_stratch_cellulose_biosynth.grp                 | -34.7822    | 0.53    |
| yeast_phosphatidic_biosynth.grp                      | -34.7822    | 0.53    |
| yeast_phosphatidic_acid_phospholipid_biosynth.grp    | -34.7822    | 0.53    |
| yeast_phosphatidic_acid_phospholipid_biosynth.grp    | -34.7822    | 0.53    |
| yeast_ergosterol_biosynth.grp                        | -34.7822    | 0.53    |
| yeast_triglyceride_biosynth.grp                      | -34.8512    | 0.55    |
| yeast_triglyceride_biosynth.grp                      | -34.8512    | 0.55    |
| yeast_fatty_acid_biosynth.grp                        | -35.4301    | 0.59    |
| yeast_fatty_acid_biosynth.grp                        | -35.4301    | 0.59    |
| yeast_carbon_monoxide_dehydrogenase.grp              | -35.4301    | 0.59    |
| yeast_carbon_monoxide_dehydrogenase.grp              | -35.4301    | 0.59    |
| yeast_sulfur_amino_acid_biosynth.grp                 | -35.4925    | 0.6     |
| yeast_sulfur_amino_acid_biosynth.grp                 | -35.4925    | 0.6     |
| yeast_phosphatidic_acid_phospholipid_biosynth.grp    | -35.4925    | 0.6     |
| yeast_aerobic_glycerol_catabolism.grp                | -35.7738    | 0.64    |
| yeast_lysine_biosynth.grp                            | -35.8449    | 0.66    |
| yeast_super_histidine_purine_pyrimidine_biosynth.grp | -35.9073    | 0.66    |
| yeast_hestidine_biosynth.grp                         | -35.9073    | 0.66    |
| yeast_threonine_methionine_biosynth.grp              | -35.9578    | 0.68    |
| yeast_threonine_methionine_biosynth.grp              | -35.9578    | 0.68    |
| yeast_threonine_biosynth.grp                         | -35.9578    | 0.68    |

Click on a column name to sort table. Click on a row to view match.

# 19) yeast\_fatty\_acid\_elongation

| Match results                                        |             |         |
|------------------------------------------------------|-------------|---------|
| Text File Name                                       | Match Score | P-Value |
| yeast_fatty_acid_elongation.grp                      | 0.0         | 0.0     |
| yeast_fatty_acid_biosynth.grp                        | -2.0        | 0.0     |
| yeast_fatty_acid_biosynth.grp                        | -4.0        | 0.0     |
| yeast_fatty_acid_biosynth.grp                        | -6.0        | 0.0     |
| yeast_fatty_acid_biosynth.grp                        | -8.0        | 0.0     |
| yeast_fatty_acid_elongation.grp                      | -16.4343    | 0.06    |
| yeast_fatty_acid_biosynth.grp                        | -16.4343    | 0.06    |
| yeast_fatty_acid_oxidation.grp                       | -17.3448    | 0.11    |
| yeast_threonine_methionine_biosynth.grp              | -17.5887    | 0.11    |
| yeast_threonine_catabolism.grp                       | -17.5887    | 0.11    |
| yeast_methionine_biosynth.grp                        | -17.5887    | 0.11    |
| yeast_TCA_cycle_aerobic_respiration.grp              | -17.9899    | 0.12    |
| yeast_glutamate_degradation7.grp                     | -17.9899    | 0.12    |
| yeast_threonine_methionine_biosynth.grp              | -18.8892    | 0.16    |
| yeast_threonine_catabolism.grp                       | -18.8892    | 0.16    |
| yeast_fatty_acid_oxidation.grp                       | -18.8892    | 0.16    |
| yeast_TCA_cycle_aerobic_respiration.grp              | -18.9333    | 0.18    |
| yeast_sulfur_amino_acid_biosynth.grp                 | -18.9333    | 0.18    |
| yeast_glutamate_degradation3.grp                     | -18.9333    | 0.18    |
| yeast_fatty_acid_oxidation.grp                       | -19.3448    | 0.2     |
| yeast_toluene_via_catechol_degradation.grp           | -19.4105    | 0.2     |
| yeast_p_cymene_degradation.grp                       | -19.4105    | 0.2     |
| yeast_p_cymene_degradation.grp                       | -19.4105    | 0.2     |
| yeast_ergosterol_biosynth.grp                        | -19.4105    | 0.2     |
| yeast_threonine_biosynth.grp                         | -19.468     | 0.2     |
| yeast_super_hexitol_degradation.grp                  | -19.468     | 0.2     |
| yeast_pantothenate_coenzymeA_biosynth.grp            | -19.468     | 0.2     |
| yeast_glucuronate_degradation.grp                    | -19.468     | 0.2     |
| yeast_threonine_methionine_biosynth.grp              | -19.5887    | 0.22    |
| yeast_threonine_catabolism.grp                       | -19.5887    | 0.22    |
| yeast_methionine_biosynth.grp                        | -19.5887    | 0.22    |
| yeast_heme_biosynth.grp                              | -19.8067    | 0.23    |
| yeast_heme_biosynth.grp                              | -19.8067    | 0.23    |
| yeast_super_histidine_purine_pyrimidine_biosynth.grp | -19.8691    | 0.23    |
| yeast_de_novo_pyrimidine_ribonuc_biosynth.grp        | -19.8691    | 0.23    |
| yeast_TCA_cycle_aerobic_respiration.grp              | -19.9899    | 0.27    |
| yeast_glutamate_degradation7.grp                     | -19.9899    | 0.27    |
| yeast_sulfur_amino_acid_biosynth.grp                 | -20.2338    | 0.28    |
| yeast_phosphatidic_acid_phospholipid_biosynth.grp    | -20.2338    | 0.28    |
| yeast_phosphatidic_acid_biosynth.grp                 | -20.2338    | 0.28    |
| yeast_mevalonate_pathway.grp                         | -20.2338    | 0.28    |
| yeast_glutamate_degradation8.grp                     | -20.2338    | 0.28    |
| yeast_glutamate_degradation8.grp                     | -20.2338    | 0.28    |
| yeast_glutamate_degradation7.grp                     | -20.2338    | 0.28    |
| yeast_ergosterol_biosynth.grp                        | -20.2338    | 0.28    |
| yeast_ectoine_synth.grp                              | -20.2338    | 0.28    |
| yeast_carbon_monoxide_dehydrogenase.grp              | -20.2338    | 0.28    |
| yeast_carbon_monoxide_dehydrogenase.grp              | -20.2338    | 0.28    |
| yeast_arginine_metabolism.grp                        | -20.2338    | 0.28    |
| yeast_arginine_metabolism.grp                        | -20.2338    | 0.28    |
| yeast_ureide_biosynth.grp                            | -20.706     | 0.33    |
| yeast_ureide_biosynth.grp                            | -20.706     | 0.33    |
| yeast_toluene_via_catechol_degradation.grp           | -20.706     | 0.33    |
| yeast_toluene_via_catechol_degradation.grp           | -20.706     | 0.33    |

Click on a column name to sort table. Click on a row to view match.



## 20) yeast\_salvage\_pyrimidine\_deoxyribonuc\_pathway

| Match results                                        |             |         |
|------------------------------------------------------|-------------|---------|
| Text File Name                                       | Match Score | P-Value |
| yeast_salvage_pyrimidine_deoxyribonuc_pathway.grp    | 0.0         | 0.0     |
| yeast_salvage_pyrimidine_ribonuc_pathway.grp         | -19.9403    | 0.0     |
| yeast_salvage_pyrimidine_ribonuc_pathway.grp         | -21.9403    | 0.0     |
| yeast_salvage_pyrimidine_ribonuc_pathway.grp         | -25.3061    | 0.02    |
| yeast_de_novo_pyrimidine_deoxynuc_biosynth.grp       | -31.0857    | 0.23    |
| yeast_de_novo_pyrimidine_deoxynuc_biosynth.grp       | -31.7341    | 0.29    |
| yeast_de_novo_pyrimidine_deoxynuc_biosynth.grp       | -31.7838    | 0.29    |
| yeast_de_novo_pyrimidine_deoxynuc_biosynth.grp       | -31.7838    | 0.29    |
| yeast_de_novo_pyrimidine_deoxynuc_biosynth.grp       | -31.7838    | 0.29    |
| yeast_super_histidine_purine_pyrimidine_biosynth.grp | -32.0128    | 0.32    |
| yeast_super_histidine_purine_pyrimidine_biosynth.grp | -33.3005    | 0.43    |
| yeast_thiamine_biosynth.grp                          | -33.3669    | 0.43    |
| yeast_NAD_salvage_pathway.grp                        | -33.4785    | 0.45    |
| yeast_super_histidine_purine_pyrimidine_biosynth.grp | -33.5946    | 0.45    |
| yeast_super_histidine_purine_pyrimidine_biosynth.grp | -33.5946    | 0.45    |
| yeast_purine_fermentation.grp                        | -33.6752    | 0.46    |
| yeast_super_histidine_purine_pyrimidine_biosynth.grp | -33.7248    | 0.46    |
| yeast_phosphatidic_acid_phospholipid_biosynth.grp    | -34.0178    | 0.5     |
| yeast_phosphatidic_acid_phospholipid_biosynth.grp    | -34.0178    | 0.5     |
| yeast_NAD_salvage_pathway.grp                        | -34.127     | 0.52    |
| yeast_de_novo_purine_nuc_biosynth.grp                | -34.3733    | 0.52    |
| yeast_de_novo_purine_nuc_biosynth.grp                | -34.9629    | 0.58    |
| yeast_ribose_deoxyribose_phosphate_metabolism.grp    | -35.2392    | 0.61    |
| yeast_ribose_deoxyribose_phosphate_metabolism.grp    | -35.2392    | 0.61    |
| yeast_threonine_methionine_biosynth.grp              | -35.2559    | 0.61    |
| yeast_glycolysis.grp                                 | -35.2559    | 0.61    |
| yeast_glucose_fermentation.grp                       | -35.2559    | 0.61    |
| yeast_ergosterol_biosynth.grp                        | -35.3694    | 0.67    |
| yeast_de_novo_purine_nuc_biosynth.grp                | -35.6113    | 0.69    |
| yeast_de_novo_purine_nuc_biosynth.grp                | -35.9067    | 0.69    |
| yeast_phosphatidic_acid_phospholipid_biosynth.grp    | -36.0178    | 0.74    |
| yeast_strach_cellulose_biosynth.grp                  | -36.0202    | 0.75    |
| yeast_phosphatidic_acid_phospholipid_biosynth.grp    | -36.0202    | 0.75    |
| yeast_phosphatidic_acid_phospholipid_biosynth.grp    | -36.0202    | 0.75    |
| yeast_ergosterol_biosynth.grp                        | -36.0202    | 0.75    |
| yeast_de_novo_purine_nuc_biosynth.grp                | -36.3733    | 0.77    |
| yeast_threonine_methionine_biosynth.grp              | -36.6074    | 0.77    |
| yeast_sulfur_amino_acid_biosynth.grp                 | -36.6074    | 0.77    |
| yeast_phenylalanine_tyrosine_tryptophan_biosynth.grp | -36.6074    | 0.77    |
| yeast_pantothenate_coenzymeA_biosynth.grp            | -36.6074    | 0.77    |
| yeast_chorismate_pathway.grp                         | -36.6074    | 0.77    |
| yeast_ureide_degradation.grp                         | -36.6748    | 0.79    |
| yeast_ureide_degradation.grp                         | -36.6748    | 0.79    |
| yeast_ureide_degradation.grp                         | -36.6748    | 0.79    |
| yeast_sucrose_biosynth.grp                           | -37.1875    | 0.79    |
| yeast_ribose_deoxyribose_phosphate_metabolism.grp    | -37.2392    | 0.8     |
| yeast_phenylalanine_tyrosine_tryptophan_biosynth.grp | -37.2392    | 0.8     |
| yeast_chorismate_pathway.grp                         | -37.2392    | 0.8     |
| yeast_phenylalanine_tyrosine_tryptophan_biosynth.grp | -37.2416    | 0.8     |
| yeast_chorismate_pathway.grp                         | -37.2416    | 0.8     |
| yeast_glycolysis.grp                                 | -37.2559    | 0.82    |
| yeast_glucose_fermentation.grp                       | -37.2559    | 0.82    |
| yeast_chorismate_pathway.grp                         | -37.2583    | 0.82    |

Click on a column name to sort table. Click on a row to view match.

## 21) yeast\_super\_ileucine\_valine\_biosynth2

| Match results                                               |             |         |
|-------------------------------------------------------------|-------------|---------|
| Text File Name                                              | Match Score | P-Value |
| yeast_valine_biosynth.grp                                   | 0.0         | 0.0     |
| yeast_super_leucine_ileucine_valine_biosynth1.grp           | 0.0         | 0.0     |
| yeast_super_ileucine_valine_biosynth2.grp                   | 0.0         | 0.0     |
| yeast_super_ileucine_valine_biosynth1.grp                   | 0.0         | 0.0     |
| yeast_ileucine_biosynth.grp                                 | 0.0         | 0.0     |
| yeast_super_ileucine_valine_biosynth1.grp                   | -2.0        | 0.0     |
| yeast_ileucine_biosynth.grp                                 | -2.0        | 0.0     |
| yeast_super_leucine_ileucine_valine_biosynth2.grp           | -4.89037    | 0.0     |
| yeast_super_leucine_ileucine_valine_biosynth2.grp           | -5.76519    | 0.0     |
| yeast_super_leucine_ileucine_valine_biosynth1.grp           | -13.9824    | 0.0     |
| yeast_super_leucine_ileucine_valine_biosynth1.grp           | -19.3247    | 0.02    |
| yeast_leucine_biosynth.grp                                  | -19.3247    | 0.02    |
| yeast_super_leucine_ileucine_valine_biosynth2.grp           | -19.7476    | 0.03    |
| yeast_super_ileucine_valine_biosynth1.grp                   | -19.7476    | 0.03    |
| yeast_ileucine_biosynth.grp                                 | -19.7476    | 0.03    |
| yeast_super_phenylalanine_tyrosine_tryptophan_biosynth1.grp | -19.8951    | 0.03    |
| yeast_super_leucine_ileucine_valine_biosynth1.grp           | -20.4932    | 0.03    |
| yeast_phenylalanine_tyrosine_tryptophan_biosynth.grp        | -21.8951    | 0.11    |
| yeast_chorismate_pathway.grp                                | -21.8951    | 0.11    |
| yeast_super_leucine_ileucine_valine_biosynth1.grp           | -22.1995    | 0.11    |
| yeast_phenylalanine_tyrosine_tryptophan_biosynth.grp        | -22.7699    | 0.13    |
| yeast_chorismate_pathway.grp                                | -22.7699    | 0.13    |
| yeast_lysine_biosynth.grp                                   | -23.6014    | 0.23    |
| yeast_mevalonate_pathway.grp                                | -23.6588    | 0.24    |
| yeast_ergosterol_biosynth.grp                               | -23.6588    | 0.24    |
| yeast_serine_isocitrate_lyase_pathway.grp                   | -23.8356    | 0.25    |
| yeast_serine_isocitrate_lyase_pathway.grp                   | -24.4449    | 0.31    |
| yeast_phenylalanine_tyrosine_tryptophan_biosynth.grp        | -24.7699    | 0.34    |
| yeast_chorismate_pathway.grp                                | -24.7699    | 0.34    |
| yeast_serine_isocitrate_lyase_pathway.grp                   | -25.0899    | 0.35    |
| yeast_serine_isocitrate_lyase_pathway.grp                   | -25.1906    | 0.36    |
| yeast_super_phenylalanine_tyrosine_biosynth.grp             | -25.2219    | 0.37    |
| yeast_super_histidine_purine_pyrimidine_biosynth.grp        | -25.2219    | 0.37    |
| yeast_super_histidine_purine_pyrimidine_biosynth.grp        | -25.2219    | 0.37    |
| yeast_phenylalanine_tyrosine_tryptophan_biosynth.grp        | -25.2219    | 0.37    |
| yeast_histidine_biosynth.grp                                | -25.2219    | 0.37    |
| yeast_chorismate_pathway.grp                                | -25.2219    | 0.37    |
| yeast_heme_biosynth.grp                                     | -25.4724    | 0.4     |
| yeast_glucuronate_degradation.grp                           | -25.6513    | 0.4     |
| yeast_TCA_cycle_aerobic_respiration.grp                     | -25.6588    | 0.41    |
| yeast_mevalonate_pathway.grp                                | -25.6588    | 0.41    |
| yeast_ergosterol_biosynth.grp                               | -25.6588    | 0.41    |
| yeast_sulfur_amino_acid_biosynth.grp                        | -25.8057    | 0.43    |
| yeast_p_cymene_degradation.grp                              | -25.828     | 0.43    |
| yeast_phenylalanine_tyrosine_tryptophan_biosynth.grp        | -25.828     | 0.43    |
| yeast_glucose_fermentation.grp                              | -25.828     | 0.43    |
| yeast_chorismate_pathway.grp                                | -25.828     | 0.43    |
| yeast_chorismate_biosynth.grp                               | -25.828     | 0.43    |
| yeast_serine_isocitrate_lyase_pathway.grp                   | -25.8356    | 0.46    |
| yeast_de_novo_purine_nuc_biosynth.grp                       | -25.8443    | 0.47    |
| yeast_super_histidine_purine_pyrimidine_biosynth.grp        | -26.2832    | 0.5     |
| yeast_histidine_biosynth.grp                                | -26.2832    | 0.5     |
| yeast_folic_acid_biosynth.grp                               | -26.3039    | 0.5     |
| yeast_TCA_cycle_aerobic_respiration.grp                     | -26.5174    | 0.52    |
| yeast_lysine_biosynth.grp                                   | -26.5174    | 0.52    |

Click on a column name to sort table. Click on a row to view match.

## 22) yeast\_leucine\_biosynth

| Match results                                              |             |         |
|------------------------------------------------------------|-------------|---------|
| Text File Name                                             | Match Score | P-Value |
| yeast_super_leucine_ileucine_valine_biosynth1.grp          | 0.0         | 0.0     |
| yeast_leucine_biosynth.grp                                 | 0.0         | 0.0     |
| yeast_super_leucine_ileucine_valine_biosynth1.grp          | -2.0        | 0.0     |
| yeast_super_leucine_ileucine_valine_biosynth1.grp          | -4.0        | 0.0     |
| yeast_super_leucine_ileucine_valine_biosynth1.grp          | -6.0        | 0.0     |
| yeast_super_leucine_ileucine_valine_biosynth2.grp          | -16.2277    | 0.0     |
| yeast_super_leucine_ileucine_valine_biosynth1.grp          | -16.728     | 0.0     |
| yeast_lysine_biosynth.grp                                  | -17.2501    | 0.01    |
| yeast_super_ileucine_valine_biosynth1.grp                  | -19.1025    | 0.01    |
| yeast_ileucine_biosynth.grp                                | -19.1025    | 0.01    |
| yeast_valine_biosynth.grp                                  | -19.3247    | 0.02    |
| yeast_super_ileucine_valine_biosynth2.grp                  | -19.3247    | 0.02    |
| yeast_super_ileucine_valine_biosynth1.grp                  | -19.3247    | 0.02    |
| yeast_ileucine_biosynth.grp                                | -19.3247    | 0.02    |
| yeast_TCA_cycle_aerobic_respiration.grp                    | -21.1906    | 0.06    |
| yeast_phenylalanine_tyrosine_tryptophan_biosynth.grp       | -21.8489    | 0.1     |
| yeast_chorismate_pathway.grp                               | -21.8489    | 0.1     |
| yeast_super_leucine_ileucine_valine_biosynth2.grp          | -22.1995    | 0.1     |
| yeast_super_phenylalanine_tyrosine_tryptophan_biosynth.grp | -22.3009    | 0.11    |
| yeast_phenylalanine_tyrosine_tryptophan_biosynth.grp       | -22.8273    | 0.14    |
| yeast_chorismate_pathway.grp                               | -22.8273    | 0.14    |
| yeast_chorismate_biosynth.grp                              | -22.8273    | 0.14    |
| yeast_TCA_cycle_aerobic_respiration.grp                    | -23.1906    | 0.15    |
| yeast_serine_isocitrate_lyase_pathway.grp                  | -23.2425    | 0.16    |
| yeast_serine_isocitrate_lyase_pathway.grp                  | -23.8356    | 0.22    |
| yeast_p_cymene_degradation.grp                             | -23.8356    | 0.22    |
| yeast_phenylalanine_tyrosine_tryptophan_biosynth.grp       | -23.8519    | 0.23    |
| yeast_folic_acid_biosynth.grp                              | -23.8519    | 0.23    |
| yeast_chorismate_pathway.grp                               | -23.8519    | 0.23    |
| yeast_phenylalanine_tyrosine_tryptophan_biosynth.grp       | -23.945     | 0.23    |
| yeast_chorismate_pathway.grp                               | -23.945     | 0.23    |
| yeast_chorismate_biosynth.grp                              | -23.945     | 0.23    |
| yeast_threonine_catabolism.grp                             | -24.0817    | 0.25    |
| yeast_serine_isocitrate_lyase_pathway.grp                  | -24.4449    | 0.26    |
| yeast_sulfur_amino_acid_biosynth.grp                       | -24.5052    | 0.28    |
| yeast_serine_isocitrate_lyase_pathway.grp                  | -24.59      | 0.29    |
| yeast_serine_isocitrate_lyase_pathway.grp                  | -25.0899    | 0.33    |
| yeast_folic_acid_biosynth.grp                              | -25.0899    | 0.33    |
| yeast_chorismate_pathway.grp                               | -25.0899    | 0.33    |
| yeast_super_phenylalanine_tyrosine_biosynth.grp            | -25.1757    | 0.33    |
| yeast_phenylalanine_tyrosine_tryptophan_biosynth.grp       | -25.1757    | 0.33    |
| yeast_fatty_acid_oxidation.grp                             | -25.2793    | 0.36    |
| yeast_fatty_acid_biosynth.grp                              | -25.2793    | 0.36    |
| yeast_sulfur_amino_acid_biosynth.grp                       | -25.4724    | 0.37    |
| yeast_methionine_degradation.grp                           | -25.4724    | 0.37    |
| yeast_glucuronate_degradation.grp                          | -25.6513    | 0.39    |
| yeast_sulfur_degradation.grp                               | -25.7433    | 0.39    |
| yeast_sulfur_amino_acid_biosynth.grp                       | -25.7433    | 0.39    |
| yeast_sulfur_degradation.grp                               | -25.8057    | 0.39    |
| yeast_sulfur_amino_acid_biosynth.grp                       | -25.8057    | 0.39    |
| yeast_heme_biosynth.grp                                    | -25.828     | 0.39    |
| yeast_p_cymene_degradation.grp                             | -25.8356    | 0.4     |
| yeast_4_hydroxyproline_degradation.grp                     | -26.2414    | 0.42    |
| yeast_mevalonate_pathway.grp                               | -26.3039    | 0.43    |
| yeast_ergosterol_biosynth.grp                              | -26.3039    | 0.43    |
| yeast_sulfur_degradation.grp                               | -26.5052    | 0.47    |

Click on a column name to sort table. Click on a row to view match.

### 23) yeast\_valine\_biosynth

| Match results                                        |             |         |
|------------------------------------------------------|-------------|---------|
| Text File Name                                       | Match Score | P-Value |
| yeast_valine_biosynth.grp                            | 0.0         | 0.0     |
| yeast_super_leucine_ileucine_valine_biosynth1.grp    | 0.0         | 0.0     |
| yeast_super_ileucine_valine_biosynth2.grp            | 0.0         | 0.0     |
| yeast_super_ileucine_valine_biosynth1.grp            | 0.0         | 0.0     |
| yeast_ileucine_biosynth.grp                          | 0.0         | 0.0     |
| yeast_super_ileucine_valine_biosynth1.grp            | -2.0        | 0.0     |
| yeast_ileucine_biosynth.grp                          | -2.0        | 0.0     |
| yeast_super_leucine_ileucine_valine_biosynth2.grp    | -4.89037    | 0.0     |
| yeast_super_leucine_ileucine_valine_biosynth2.grp    | -5.76519    | 0.0     |
| yeast_super_leucine_ileucine_valine_biosynth1.grp    | -13.9824    | 0.0     |
| yeast_super_leucine_ileucine_valine_biosynth1.grp    | -19.3247    | 0.02    |
| yeast_leucine_biosynth.grp                           | -19.3247    | 0.02    |
| yeast_super_leucine_ileucine_valine_biosynth2.grp    | -19.7476    | 0.03    |
| yeast_super_ileucine_valine_biosynth1.grp            | -19.7476    | 0.03    |
| yeast_ileucine_biosynth.grp                          | -19.7476    | 0.03    |
| yeast_super_phenylalanine_tyrosine_tryptophan_bio... | -19.8951    | 0.03    |
| yeast_super_leucine_ileucine_valine_biosynth1.grp    | -20.4932    | 0.03    |
| yeast_phenylalanine_tyrosine_tryptophan_biosynth.grp | -21.8951    | 0.11    |
| yeast_chorismate_pathway.grp                         | -21.8951    | 0.11    |
| yeast_super_leucine_ileucine_valine_biosynth1.grp    | -22.1995    | 0.11    |
| yeast_phenylalanine_tyrosine_tryptophan_biosynth.grp | -22.7699    | 0.13    |
| yeast_chorismate_pathway.grp                         | -22.7699    | 0.13    |
| yeast_lysine_biosynth.grp                            | -23.6014    | 0.23    |
| yeast_mevalonate_pathway.grp                         | -23.6588    | 0.24    |
| yeast_ergosterol_biosynth.grp                        | -23.6588    | 0.24    |
| yeast_serine_isocitrate_lyase_pathway.grp            | -23.8356    | 0.25    |
| yeast_serine_isocitrate_lyase_pathway.grp            | -24.4449    | 0.31    |
| yeast_phenylalanine_tyrosine_tryptophan_biosynth.grp | -24.7699    | 0.34    |
| yeast_chorismate_pathway.grp                         | -24.7699    | 0.34    |
| yeast_serine_isocitrate_lyase_pathway.grp            | -25.0899    | 0.35    |
| yeast_serine_isocitrate_lyase_pathway.grp            | -25.1906    | 0.36    |
| yeast_super_phenylalanine_tyrosine_biosynth.grp      | -25.2219    | 0.37    |
| yeast_super_histidine_purine_pyrimidine_biosynth.grp | -25.2219    | 0.37    |
| yeast_super_histidine_purine_pyrimidine_biosynth.grp | -25.2219    | 0.37    |
| yeast_phenylalanine_tyrosine_tryptophan_biosynth.grp | -25.2219    | 0.37    |
| yeast_histidine_biosynth.grp                         | -25.2219    | 0.37    |
| yeast_chorismate_pathway.grp                         | -25.2219    | 0.37    |
| yeast_heme_biosynth.grp                              | -25.4724    | 0.4     |
| yeast_glucuronate_degradation.grp                    | -25.6513    | 0.4     |
| yeast_TCA_cycle_aerobic_respiration.grp              | -25.6588    | 0.41    |
| yeast_mevalonate_pathway.grp                         | -25.6588    | 0.41    |
| yeast_ergosterol_biosynth.grp                        | -25.6588    | 0.41    |
| yeast_sulfur_amino_acid_biosynth.grp                 | -25.8057    | 0.43    |
| yeast_p_cymene_degradation.grp                       | -25.828     | 0.43    |
| yeast_phenylalanine_tyrosine_tryptophan_biosynth.grp | -25.828     | 0.43    |
| yeast_glucose_fermentation.grp                       | -25.828     | 0.43    |
| yeast_chorismate_pathway.grp                         | -25.828     | 0.43    |
| yeast_chorismate_biosynth.grp                        | -25.828     | 0.43    |
| yeast_serine_isocitrate_lyase_pathway.grp            | -25.8356    | 0.46    |
| yeast_de_novo_purine_nuc_biosynth.grp                | -25.8443    | 0.47    |
| yeast_super_histidine_purine_pyrimidine_biosynth.grp | -26.2832    | 0.5     |
| yeast_histidine_biosynth.grp                         | -26.2832    | 0.5     |
| yeast_folic_acid_biosynth.grp                        | -26.3039    | 0.5     |
| yeast_TCA_cycle_aerobic_respiration.grp              | -26.5174    | 0.52    |
| yeast_lysine_biosynth.grp                            | -26.5174    | 0.52    |

Click on a column name to sort table. Click on a row to view match.

## 24) yeast\_ileucine\_biosynth

| Match results                                              |             |         |
|------------------------------------------------------------|-------------|---------|
| Text File Name                                             | Match Score | P-Value |
| yeast_super_ileucine_valine_biosynth1.grp                  | 0.0         | 0.0     |
| yeast_ileucine_biosynth.grp                                | 0.0         | 0.0     |
| yeast_super_leucine_ileucine_valine_biosynth2.grp          | -11.5304    | 0.0     |
| yeast_super_leucine_ileucine_valine_biosynth1.grp          | -22.1995    | 0.0     |
| yeast_super_leucine_ileucine_valine_biosynth1.grp          | -25.0899    | 0.02    |
| yeast_super_leucine_ileucine_valine_biosynth1.grp          | -27.0899    | 0.06    |
| yeast_chorismate_pathway.grp                               | -27.6603    | 0.07    |
| yeast_super_leucine_ileucine_valine_biosynth2.grp          | -27.9647    | 0.08    |
| yeast_super_ileucine_valine_biosynth1.grp                  | -27.9647    | 0.08    |
| yeast_ileucine_biosynth.grp                                | -27.9647    | 0.08    |
| yeast_super_phenylalanine_tyrosine_tryptophan_biosynth.grp | -28.1122    | 0.08    |
| yeast_super_leucine_ileucine_valine_biosynth1.grp          | -28.2584    | 0.08    |
| yeast_phenylalanine_tyrosine_tryptophan_biosynth.grp       | -28.5351    | 0.08    |
| yeast_chorismate_pathway.grp                               | -28.5351    | 0.08    |
| yeast_super_leucine_ileucine_valine_biosynth1.grp          | -28.7104    | 0.11    |
| yeast_phenylalanine_tyrosine_tryptophan_biosynth.grp       | -30.1122    | 0.23    |
| yeast_serine_isocitrate_lyase_pathway.grp                  | -30.2101    | 0.23    |
| yeast_serine_isocitrate_lyase_pathway.grp                  | -30.9557    | 0.28    |
| yeast_phenylalanine_tyrosine_tryptophan_biosynth.grp       | -30.9871    | 0.29    |
| yeast_chorismate_pathway.grp                               | -30.9871    | 0.29    |
| yeast_heme_biosynth.grp                                    | -31.2376    | 0.29    |
| yeast_serine_isocitrate_lyase_pathway.grp                  | -31.7177    | 0.36    |
| yeast_mevalonate_pathway.grp                               | -31.876     | 0.38    |
| yeast_ergosterol_biosynth.grp                              | -31.876     | 0.38    |
| yeast_serine_isocitrate_lyase_pathway.grp                  | -32.0527    | 0.4     |
| yeast_chorismate_pathway.grp                               | -32.069     | 0.4     |
| yeast_serine_isocitrate_lyase_pathway.grp                  | -32.2025    | 0.4     |
| yeast_TCA_cycle_aerobic_respiration.grp                    | -32.2989    | 0.43    |
| yeast_phenylalanine_tyrosine_tryptophan_biosynth.grp       | -32.2989    | 0.43    |
| yeast_chorismate_pathway.grp                               | -32.2989    | 0.43    |
| yeast_chorismate_biosynth.grp                              | -32.2989    | 0.43    |
| yeast_arginine_metabolism.grp                              | -32.3294    | 0.44    |
| yeast_super_histidine_purine_pyrimidine_biosynth.grp       | -32.6231    | 0.46    |
| yeast_phenylalanine_tyrosine_tryptophan_biosynth.grp       | -32.8551    | 0.47    |
| yeast_heme_biosynth.grp                                    | -33.2784    | 0.49    |
| yeast_threonine_methionine_biosynth.grp                    | -33.3778    | 0.51    |
| yeast_super_phenylalanine_tyrosine_biosynth.grp            | -33.439     | 0.51    |
| yeast_super_histidine_purine_pyrimidine_biosynth.grp       | -33.439     | 0.51    |
| yeast_histidine_biosynth.grp                               | -33.439     | 0.51    |
| yeast_lysine_biosynth.grp                                  | -33.5369    | 0.52    |
| yeast_sulfur_degradation.grp                               | -33.6434    | 0.57    |
| yeast_sulfur_amino_acid_biosynth.grp                       | -33.6434    | 0.57    |
| yeast_super_histidine_purine_pyrimidine_biosynth.grp       | -33.6975    | 0.58    |
| yeast_de_novo_purine_nuc_biosynth.grp                      | -33.6975    | 0.58    |
| yeast_p_cymene_degradation.grp                             | -33.7299    | 0.58    |
| yeast_heme_biosynth.grp                                    | -33.7299    | 0.58    |
| yeast_folic_acid_biosynth.grp                              | -33.7299    | 0.58    |
| yeast_glucuronate_degradation.grp                          | -33.8684    | 0.59    |
| yeast_TCA_cycle_aerobic_respiration.grp                    | -33.876     | 0.59    |
| yeast_heme_biosynth.grp                                    | -33.999     | 0.59    |
| yeast_p_cymene_degradation.grp                             | -34.0452    | 0.59    |
| yeast_glucose_fermentation.grp                             | -34.0452    | 0.59    |
| yeast_de_novo_purine_nuc_biosynth.grp                      | -34.0615    | 0.59    |
| yeast_chorismate_biosynth.grp                              | -34.2825    | 0.6     |
| yeast_mevalonate_pathway.grp                               | -34.2989    | 0.6     |
| yeast_ergosterol_biosynth.grp                              | -34.2989    | 0.6     |

Click on a column name to sort table. Click on a row to view match.



## 25) yeast\_ileucine\_biosynth

| Match results                                              |             |         |
|------------------------------------------------------------|-------------|---------|
| Text File Name                                             | Match Score | P-Value |
| yeast_super_ileucine_valine_biosynth1.grp                  | 0.0         | 0.0     |
| yeast_ileucine_biosynth.grp                                | 0.0         | 0.0     |
| yeast_super_leucine_ileucine_valine_biosynth2.grp          | -11.5304    | 0.0     |
| yeast_super_leucine_ileucine_valine_biosynth1.grp          | -22.1995    | 0.0     |
| yeast_super_leucine_ileucine_valine_biosynth1.grp          | -25.0899    | 0.02    |
| yeast_super_leucine_ileucine_valine_biosynth1.grp          | -27.0899    | 0.06    |
| yeast_chorismate_pathway.grp                               | -27.6603    | 0.07    |
| yeast_super_leucine_ileucine_valine_biosynth2.grp          | -27.9647    | 0.08    |
| yeast_super_ileucine_valine_biosynth1.grp                  | -27.9647    | 0.08    |
| yeast_ileucine_biosynth.grp                                | -27.9647    | 0.08    |
| yeast_super_phenylalanine_tyrosine_tryptophan_biosynth.grp | -28.1122    | 0.08    |
| yeast_super_leucine_ileucine_valine_biosynth1.grp          | -28.2584    | 0.08    |
| yeast_phenylalanine_tyrosine_tryptophan_biosynth.grp       | -28.5351    | 0.08    |
| yeast_chorismate_pathway.grp                               | -28.5351    | 0.08    |
| yeast_super_leucine_ileucine_valine_biosynth1.grp          | -28.7104    | 0.11    |
| yeast_phenylalanine_tyrosine_tryptophan_biosynth.grp       | -30.1122    | 0.23    |
| yeast_serine_isocitrate_lyase_pathway.grp                  | -30.2101    | 0.23    |
| yeast_serine_isocitrate_lyase_pathway.grp                  | -30.9557    | 0.28    |
| yeast_phenylalanine_tyrosine_tryptophan_biosynth.grp       | -30.9871    | 0.29    |
| yeast_chorismate_pathway.grp                               | -30.9871    | 0.29    |
| yeast_heme_biosynth.grp                                    | -31.2376    | 0.29    |
| yeast_serine_isocitrate_lyase_pathway.grp                  | -31.7177    | 0.36    |
| yeast_mevalonate_pathway.grp                               | -31.876     | 0.38    |
| yeast_ergosterol_biosynth.grp                              | -31.876     | 0.38    |
| yeast_serine_isocitrate_lyase_pathway.grp                  | -32.0527    | 0.4     |
| yeast_chorismate_pathway.grp                               | -32.069     | 0.4     |
| yeast_serine_isocitrate_lyase_pathway.grp                  | -32.2025    | 0.4     |
| yeast_TCA_cycle_aerobic_respiration.grp                    | -32.2989    | 0.43    |
| yeast_phenylalanine_tyrosine_tryptophan_biosynth.grp       | -32.2989    | 0.43    |
| yeast_chorismate_pathway.grp                               | -32.2989    | 0.43    |
| yeast_chorismate_biosynth.grp                              | -32.2989    | 0.43    |
| yeast_arginine_metabolism.grp                              | -32.3294    | 0.44    |
| yeast_super_histidine_purine_pyrimidine_biosynth.grp       | -32.6231    | 0.46    |
| yeast_phenylalanine_tyrosine_tryptophan_biosynth.grp       | -32.8551    | 0.47    |
| yeast_heme_biosynth.grp                                    | -33.2784    | 0.49    |
| yeast_threonine_methionine_biosynth.grp                    | -33.3778    | 0.51    |
| yeast_super_phenylalanine_tyrosine_biosynth.grp            | -33.439     | 0.51    |
| yeast_super_histidine_purine_pyrimidine_biosynth.grp       | -33.439     | 0.51    |
| yeast_histidine_biosynth.grp                               | -33.439     | 0.51    |
| yeast_lysine_biosynth.grp                                  | -33.5369    | 0.52    |
| yeast_sulfur_degradation.grp                               | -33.6434    | 0.57    |
| yeast_sulfur_amino_acid_biosynth.grp                       | -33.6434    | 0.57    |
| yeast_super_histidine_purine_pyrimidine_biosynth.grp       | -33.6975    | 0.58    |
| yeast_de_novo_purine_nuc_biosynth.grp                      | -33.6975    | 0.58    |
| yeast_p_cymene_degradation.grp                             | -33.7299    | 0.58    |
| yeast_heme_biosynth.grp                                    | -33.7299    | 0.58    |
| yeast_folic_acid_biosynth.grp                              | -33.7299    | 0.58    |
| yeast_glucuronate_degradation.grp                          | -33.8684    | 0.59    |
| yeast_TCA_cycle_aerobic_respiration.grp                    | -33.876     | 0.59    |
| yeast_heme_biosynth.grp                                    | -33.999     | 0.59    |
| yeast_p_cymene_degradation.grp                             | -34.0452    | 0.59    |
| yeast_glucose_fermentation.grp                             | -34.0452    | 0.59    |
| yeast_de_novo_purine_nuc_biosynth.grp                      | -34.0615    | 0.59    |
| yeast_chorismate_biosynth.grp                              | -34.2825    | 0.6     |
| yeast_mevalonate_pathway.grp                               | -34.2989    | 0.6     |

Click on a column name to sort table. Click on a row to view match.

## 26) yeast\_super\_isoleucine\_valine\_biosynth1

| Match results                                              |             |         |
|------------------------------------------------------------|-------------|---------|
| Text File Name                                             | Match Score | P-Value |
| yeast_super_isoleucine_valine_biosynth1.grp                | 0.0         | 0.0     |
| yeast_isoleucine_biosynth.grp                              | 0.0         | 0.0     |
| yeast_super_leucine_isoleucine_valine_biosynth2.grp        | -11.5304    | 0.0     |
| yeast_super_leucine_isoleucine_valine_biosynth1.grp        | -22.1995    | 0.0     |
| yeast_super_leucine_isoleucine_valine_biosynth1.grp        | -25.0899    | 0.02    |
| yeast_super_leucine_isoleucine_valine_biosynth1.grp        | -27.0899    | 0.06    |
| yeast_chorismate_pathway.grp                               | -27.6603    | 0.07    |
| yeast_super_leucine_isoleucine_valine_biosynth2.grp        | -27.9647    | 0.08    |
| yeast_super_isoleucine_valine_biosynth1.grp                | -27.9647    | 0.08    |
| yeast_isoleucine_biosynth.grp                              | -27.9647    | 0.08    |
| yeast_super_phenylalanine_tyrosine_tryptophan_biosynth.grp | -28.1122    | 0.08    |
| yeast_super_leucine_isoleucine_valine_biosynth1.grp        | -28.2584    | 0.08    |
| yeast_phenylalanine_tyrosine_tryptophan_biosynth.grp       | -28.5351    | 0.08    |
| yeast_chorismate_pathway.grp                               | -28.5351    | 0.08    |
| yeast_super_leucine_isoleucine_valine_biosynth1.grp        | -28.7104    | 0.11    |
| yeast_phenylalanine_tyrosine_tryptophan_biosynth.grp       | -30.1122    | 0.23    |
| yeast_serine_isocitrate_lyase_pathway.grp                  | -30.2101    | 0.23    |
| yeast_serine_isocitrate_lyase_pathway.grp                  | -30.9557    | 0.28    |
| yeast_phenylalanine_tyrosine_tryptophan_biosynth.grp       | -30.9871    | 0.29    |
| yeast_chorismate_pathway.grp                               | -30.9871    | 0.29    |
| yeast_heme_biosynth.grp                                    | -31.2376    | 0.29    |
| yeast_serine_isocitrate_lyase_pathway.grp                  | -31.7177    | 0.36    |
| yeast_mevalonate_pathway.grp                               | -31.876     | 0.38    |
| yeast_ergosterol_biosynth.grp                              | -31.876     | 0.38    |
| yeast_serine_isocitrate_lyase_pathway.grp                  | -32.0527    | 0.4     |
| yeast_chorismate_pathway.grp                               | -32.069     | 0.4     |
| yeast_serine_isocitrate_lyase_pathway.grp                  | -32.2025    | 0.4     |
| yeast_TCA_cycle_aerobic_respiration.grp                    | -32.2989    | 0.43    |
| yeast_phenylalanine_tyrosine_tryptophan_biosynth.grp       | -32.2989    | 0.43    |
| yeast_chorismate_pathway.grp                               | -32.2989    | 0.43    |
| yeast_chorismate_biosynth.grp                              | -32.2989    | 0.43    |
| yeast_arginine_metabolism.grp                              | -32.3294    | 0.44    |
| yeast_super_histidine_purine_pyrimidine_biosynth.grp       | -32.6231    | 0.46    |
| yeast_phenylalanine_tyrosine_tryptophan_biosynth.grp       | -32.8551    | 0.47    |
| yeast_heme_biosynth.grp                                    | -33.2784    | 0.49    |
| yeast_threonine_methionine_biosynth.grp                    | -33.3778    | 0.51    |
| yeast_super_phenylalanine_tyrosine_biosynth.grp            | -33.439     | 0.51    |
| yeast_super_histidine_purine_pyrimidine_biosynth.grp       | -33.439     | 0.51    |
| yeast_histidine_biosynth.grp                               | -33.439     | 0.51    |
| yeast_lysinase_biosynth.grp                                | -33.5369    | 0.52    |
| yeast_sulfur_degradation.grp                               | -33.6434    | 0.57    |
| yeast_sulfur_amino_acid_biosynth.grp                       | -33.6434    | 0.57    |
| yeast_super_histidine_purine_pyrimidine_biosynth.grp       | -33.6975    | 0.58    |
| yeast_de_novo_purine_nuc_biosynth.grp                      | -33.6975    | 0.58    |
| yeast_p_cymene_degradation.grp                             | -33.7299    | 0.58    |
| yeast_heme_biosynth.grp                                    | -33.7299    | 0.58    |
| yeast_folic_acid_biosynth.grp                              | -33.7299    | 0.58    |
| yeast_glucuronate_degradation.grp                          | -33.8684    | 0.59    |
| yeast_TCA_cycle_aerobic_respiration.grp                    | -33.876     | 0.59    |
| yeast_heme_biosynth.grp                                    | -33.999     | 0.59    |
| yeast_p_cymene_degradation.grp                             | -34.0452    | 0.59    |
| yeast_glucose_fermentation.grp                             | -34.0452    | 0.59    |
| yeast_de_novo_purine_nuc_biosynth.grp                      | -34.0615    | 0.59    |
| yeast_chorismate_biosynth.grp                              | -34.2825    | 0.6     |
| yeast_mevalonate_pathway.grp                               | -34.2989    | 0.6     |
| yeast_ergosterol_biosynth.grp                              | -34.2989    | 0.6     |

Click on a column name to sort table. Click on a row to view match.

## 27) yeast\_methionine\_biosynth

| Match results                                        |             |         |
|------------------------------------------------------|-------------|---------|
| Text File Name                                       | Match Score | P-Value |
| yeast_threonine_methionine_biosynth.grp              | 0.0         | 0.0     |
| yeast_methionine_biosynth.grp                        | 0.0         | 0.0     |
| yeast_threonine_methionine_biosynth.grp              | -16.4343    | 0.0     |
| yeast_sulfur_amino_acid_biosynth.grp                 | -28.9787    | 0.0     |
| yeast_sulfur_degradation.grp                         | -29.6782    | 0.0     |
| yeast_arginine_metabolism.grp                        | -36.3794    | 0.09    |
| yeast_glucose_fermentation.grp                       | -37.0207    | 0.13    |
| yeast_sulfur_degradation.grp                         | -37.3334    | 0.16    |
| yeast_arginine_metabolism.grp                        | -38.3794    | 0.22    |
| yeast_TCA_cycle_aerobic_respiration.grp              | -39.2506    | 0.34    |
| yeast_aerobic_glycerol_catabolism.grp                | -39.4967    | 0.37    |
| yeast_phosphatidic_acid_phospholipid_biosynth.grp    | -39.7551    | 0.41    |
| yeast_glucose_fermentation.grp                       | -39.8807    | 0.44    |
| yeast_glycolysis.grp                                 | -40.0284    | 0.44    |
| yeast_glucose_fermentation.grp                       | -40.0284    | 0.44    |
| yeast_glycolysis.grp                                 | -40.618     | 0.55    |
| yeast_glucose_fermentation.grp                       | -40.618     | 0.55    |
| yeast_aerobic_glycerol_catabolism.grp                | -40.618     | 0.55    |
| yeast_sulfur_amino_acid_biosynth.grp                 | -40.7396    | 0.58    |
| yeast_phosphatidic_acid_phospholipid_biosynth.grp    | -41.1066    | 0.65    |
| yeast_pantothenate_coenzymeA_biosynth.grp            | -41.6559    | 0.69    |
| yeast_phosphatidic_biosynth.grp                      | -41.7551    | 0.7     |
| yeast_phosphatidic_biosynth.grp                      | -41.7551    | 0.7     |
| yeast_phosphatidic_acid_phospholipid_biosynth.grp    | -41.7551    | 0.7     |
| yeast_phosphatidic_acid_phospholipid_biosynth.grp    | -41.7551    | 0.7     |
| yeast_phosphatidic_acid_phospholipid_biosynth.grp    | -41.7551    | 0.7     |
| yeast_super_histidine_purine_pyrimidine_biosynth.grp | -41.8365    | 0.73    |
| yeast_de_novo_pyrimidine_ribonuc_biosynth.grp        | -41.8365    | 0.73    |
| yeast_chorismate_pathway.grp                         | -41.8365    | 0.73    |
| yeast_lysine_biosynth.grp                            | -41.856     | 0.73    |
| yeast_glucose_fermentation.grp                       | -41.8807    | 0.74    |
| yeast_glycolysis.grp                                 | -42.0284    | 0.74    |
| yeast_aerobic_glycerol_catabolism.grp                | -42.0284    | 0.74    |
| yeast_phenylalanine_tyrosine_tryptophan_biosynth.grp | -42.1025    | 0.74    |
| yeast_chorismate_pathway.grp                         | -42.1025    | 0.74    |
| yeast_de_novo_pyrimidine_deoxynuc_biosynth.grp       | -42.1446    | 0.77    |
| yeast_super_leucine_ileucine_valine_biosynth1.grp    | -42.1535    | 0.77    |
| yeast_super_histidine_purine_pyrimidine_biosynth.grp | -42.1535    | 0.77    |
| yeast_histidine_biosynth.grp                         | -42.1535    | 0.77    |
| yeast_phosphatidic_biosynth.grp                      | -42.207     | 0.77    |
| yeast_super_histidine_purine_pyrimidine_biosynth.grp | -42.2194    | 0.77    |
| yeast_ubiquinone_Q_prenylation.grp                   | -42.2581    | 0.77    |
| yeast_ubiquinone_biosynth.grp                        | -42.2581    | 0.77    |
| yeast_threonine_catabolism.grp                       | -42.3327    | 0.78    |
| yeast_super_histidine_purine_pyrimidine_biosynth.grp | -42.3784    | 0.78    |
| yeast_de_novo_purine_nuc_biosynth.grp                | -42.3784    | 0.78    |
| yeast_de_novo_purine_nuc_biosynth.grp                | -42.3784    | 0.78    |
| yeast_threonine_catabolism.grp                       | -42.4092    | 0.78    |
| yeast_ergosterol_biosynth.grp                        | -42.4919    | 0.78    |
| yeast_aerobic_glycerol_catabolism.grp                | -42.618     | 0.79    |
| yeast_glucuronate_degradation.grp                    | -42.768     | 0.79    |
| yeast_serine_isocitrate_lyase_pathway.grp            | -42.809     | 0.79    |
| yeast_phenylalanine_tyrosine_tryptophan_biosynth.grp | -42.968     | 0.81    |
| yeast_chorismate_pathway.grp                         | -42.968     | 0.81    |
| yeast_chorismate_biosynth.grp                        | -42.968     | 0.81    |
| yeast_glutamate_degradation7.grp                     | -42.9746    | 0.81    |

Click on a column name to sort table. Click on a row to view match.



## 28) yeast\_threonine\_biosynth

| Match results                                        |             |         |
|------------------------------------------------------|-------------|---------|
| Text File Name                                       | Match Score | P-Value |
| yeast_threonine_methionine_biosynth.grp              | 0.0         | 0.0     |
| yeast_threonine_biosynth.grp                         | 0.0         | 0.0     |
| yeast_methionine_biosynth.grp                        | -8.07776    | 0.0     |
| yeast_threonine_methionine_biosynth.grp              | -16.4343    | 0.0     |
| yeast_aerobic_glycerol_catabolism.grp                | -27.3941    | 0.04    |
| yeast_glycolysis.grp                                 | -28.0391    | 0.05    |
| yeast_glucose_fermentation.grp                       | -28.0391    | 0.05    |
| yeast_sulfur_degradation.grp                         | -28.7768    | 0.06    |
| yeast_glucose_fermentation.grp                       | -29.6612    | 0.1     |
| yeast_glucose_fermentation.grp                       | -30.0391    | 0.12    |
| yeast_arginine_metabolism.grp                        | -30.0415    | 0.12    |
| yeast_sulfur_amino_acid_biosynth.grp                 | -30.0773    | 0.12    |
| yeast_sulfate_assimilation_pathway2.grp              | -30.0773    | 0.12    |
| yeast_TCA_cycle_aerobic_respiration.grp              | -31.0335    | 0.25    |
| yeast_aerobic_glycerol_catabolism.grp                | -31.2795    | 0.26    |
| yeast_glucose_fermentation.grp                       | -31.6612    | 0.35    |
| yeast_arginine_metabolism.grp                        | -32.0415    | 0.39    |
| yeast_sulfur_amino_acid_biosynth.grp                 | -32.5224    | 0.46    |
| yeast_serine_isocitrate_lyase_pathway.grp            | -32.5894    | 0.47    |
| yeast_pantothenate_coenzymeA_biosynth.grp            | -32.6744    | 0.47    |
| yeast_threonine_methionine_biosynth.grp              | -32.8687    | 0.52    |
| yeast_threonine_biosynth.grp                         | -32.8687    | 0.52    |
| yeast_methionine_biosynth.grp                        | -32.8687    | 0.52    |
| yeast_threonine_catabolism.grp                       | -32.9016    | 0.52    |
| yeast_TCA_cycle_aerobic_respiration.grp              | -33.0335    | 0.53    |
| yeast_glycolysis.grp                                 | -33.0493    | 0.53    |
| yeast_glucose_fermentation.grp                       | -33.0493    | 0.53    |
| yeast_phosphatidic_acid_phospholipid_biosynth.grp    | -33.4548    | 0.61    |
| yeast_mevalonate_pathway.grp                         | -33.5104    | 0.64    |
| yeast_ergosterol_biosynth.grp                        | -33.5104    | 0.64    |
| yeast_threonine_methionine_biosynth.grp              | -33.6307    | 0.66    |
| yeast_lysinine_biosynth.grp                          | -33.6388    | 0.66    |
| yeast_glycolysis.grp                                 | -33.6388    | 0.66    |
| yeast_aerobic_glycerol_catabolism.grp                | -33.6388    | 0.66    |
| yeast_lysinine_biosynth.grp                          | -33.9148    | 0.68    |
| yeast_aerobic_glycerol_catabolism.grp                | -33.9329    | 0.68    |
| yeast_sulfur_amino_acid_biosynth.grp                 | -34.0065    | 0.68    |
| yeast_de_novo_purine_nuc_biosynth.grp                | -34.1613    | 0.7     |
| yeast_glucuronate_degradation.grp                    | -34.5508    | 0.71    |
| yeast_phenylalanine_tyrosine_tryptophan_biosynth.grp | -34.7439    | 0.71    |
| yeast_mevalonate_pathway.grp                         | -34.7439    | 0.71    |
| yeast_ergosterol_biosynth.grp                        | -34.7439    | 0.71    |
| yeast_chorismate_pathway.grp                         | -34.7439    | 0.71    |
| yeast_chorismate_biosynth.grp                        | -34.7439    | 0.71    |
| yeast_phenylalanine_tyrosine_tryptophan_biosynth.grp | -34.7484    | 0.72    |
| yeast_chorismate_pathway.grp                         | -34.7484    | 0.72    |
| yeast_chorismate_biosynth.grp                        | -34.7484    | 0.72    |
| yeast_super_leucine_isoleucine_valine_biosynth2.grp  | -34.7508    | 0.72    |
| yeast_super_isoleucine_valine_biosynth1.grp          | -34.7508    | 0.72    |
| yeast_phenylalanine_tyrosine_tryptophan_biosynth.grp | -34.7508    | 0.72    |
| yeast_isoleucine_biosynth.grp                        | -34.7508    | 0.72    |
| yeast_chorismate_pathway.grp                         | -34.7508    | 0.72    |
| yeast_chorismate_biosynth.grp                        | -34.7508    | 0.72    |
| yeast_glutamate_degradation7.grp                     | -34.7575    | 0.74    |
| yeast_phosphatidic_acid_phospholipid_biosynth.grp    | -34.8063    | 0.74    |

Click on a column name to sort table. Click on a row to view match.
