# Supplementary material for: PathCards: multi-source consolidation of human biological pathways
Source: Oxford University Press journal article supplement (doi:10.1093/database/bav006), 2015-01-01
Supplement: bav006_Supplementary_Data.zip [file bav006_Supplementary_Data.zip]

Archive with 1 entries (1 files):
- supp.pdf
